# Supplementary material for: Cross-sectional study examining the status of intrinsic capacity decline in community-dwelling older adults in China: prevalence, associated factors and implications for clinical care
Source: PubMed Central journal article supplement — BMJ Open. 2021 Jan 5;11(1):e043062. doi: 10.1136/bmjopen-2020-043062 (PMC7786809; doi:10.1136/bmjopen-2020-043062), 2021-01-05
Supplement: bmjopen-2020-043062.draft_revisions.pdf [file bmjopen-2020-043062.draft_revisions.pdf]

# BMJ Open

BMJ Open is committed to open peer review. As part of this commitment we make the peer review history of every article we publish publicly available.

When an article is published we post the peer reviewers' comments and the authors' responses online. We also post the versions of the paper that were used during peer review. These are the versions that the peer review comments apply to.

The versions of the paper that follow are the versions that were submitted during the peer review process. They are not the versions of record or the final published versions. They should not be cited or distributed as the published version of this manuscript.

BMJ Open is an open access journal and the full, final, typeset and author-corrected version of record of the manuscript is available on our site with no access controls, subscription charges or pay-per-view fees (<http://bmjopen.bmj.com>).

If you have any questions on BMJ Open's open peer review process please email [info.bmjopen@bmj.com](mailto:info.bmjopen@bmj.com)

# BMJ Open

## Status of Intrinsic Capacity Decline in China: Prevalence, Associated Factors, and Implications for Clinical Care

|                               |                                                                                                                                                                                                                  |
|-------------------------------|------------------------------------------------------------------------------------------------------------------------------------------------------------------------------------------------------------------|
| Journal:                      | <i>BMJ Open</i>                                                                                                                                                                                                  |
| Manuscript ID                 | bmjopen-2020-043062                                                                                                                                                                                              |
| Article Type:                 | Original research                                                                                                                                                                                                |
| Date Submitted by the Author: | 23-Jul-2020                                                                                                                                                                                                      |
| Complete List of Authors:     | Ma, Lina; Xuanwu Hospital, Department of Geriatrics<br>Chhetri, Jagadish K; Xuanwu Hospital<br>Zhang, Li; Xuanwu Hospital<br>Sun, Fei; Xuanwu Hospital<br>Li, Yun; Xuanwu Hospital<br>Tang, Zhe; Xuanwu Hospital |
| Keywords:                     | GERIATRIC MEDICINE, EPIDEMIOLOGY, GENERAL MEDICINE (see Internal Medicine)                                                                                                                                       |
|                               |                                                                                                                                                                                                                  |

SCHOLARONE™  
Manuscripts

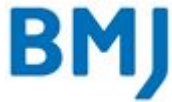

I, the Submitting Author has the right to grant and does grant on behalf of all authors of the Work (as defined in the below author licence), an exclusive licence and/or a non-exclusive licence for contributions from authors who are: i) UK Crown employees; ii) where BMJ has agreed a CC-BY licence shall apply, and/or iii) in accordance with the terms applicable for US Federal Government officers or employees acting as part of their official duties; on a worldwide, perpetual, irrevocable, royalty-free basis to BMJ Publishing Group Ltd ("BMJ") its licensees and where the relevant Journal is co-owned by BMJ to the co-owners of the Journal, to publish the Work in this journal and any other BMJ products and to exploit all rights, as set out in our [licence](#).

The Submitting Author accepts and understands that any supply made under these terms is made by BMJ to the Submitting Author unless you are acting as an employee on behalf of your employer or a postgraduate student of an affiliated institution which is paying any applicable article publishing charge ("APC") for Open Access articles. Where the Submitting Author wishes to make the Work available on an Open Access basis (and intends to pay the relevant APC), the terms of reuse of such Open Access shall be governed by a Creative Commons licence – details of these licences and which [Creative Commons](#) licence will apply to this Work are set out in our licence referred to above.

Other than as permitted in any relevant BMJ Author's Self Archiving Policies, I confirm this Work has not been accepted for publication elsewhere, is not being considered for publication elsewhere and does not duplicate material already published. I confirm all authors consent to publication of this Work and authorise the granting of this licence.

1  
2  
3 **1 Status of Intrinsic Capacity Decline in China: Prevalence, Associated Factors, and**  
4  
5 **2 Implications for Clinical Care**  
6

7  
8 3 Lina Ma<sup>1</sup>, Jagadish K. Chhetri<sup>1</sup>, Li Zhang<sup>1</sup>, Fei Sun<sup>2</sup>, Yun Li<sup>1</sup>, Zhe Tang<sup>1,2</sup>  
9

10 4 <sup>1</sup> Department of Geriatrics, Xuanwu Hospital, Capital Medical University, China National Clinical  
11  
12 5 Research Center for Geriatric Disorders, Beijing 100053, China.  
13

14 6 <sup>2</sup> Beijing Institute of Geriatrics, Xuanwu Hospital, Capital Medical University, Beijing 100053,  
15  
16 7 China  
17

18  
19 8 **Correspondence:** Dr. Zhe Tang, Beijing Institute of Geriatrics, Xuanwu Hospital, Capital Medical  
20  
21 9 University, e-mail: tangzhe@sina.com; Dr. Lina Ma, Department of Geriatrics, Xuanwu Hospital,  
22  
23 10 Capital Medical University, e-mail: [malina0883@126.com](mailto:malina0883@126.com).  
24  
25

26 11  
27  
28 12 Running title: Status of Intrinsic Capacity Decline in China  
29

30  
31 13 Main text word count: 3248  
32

33 14 Data elements: 3 Tables, 2 Figures, 2 Supplementary Tables  
34  
35  
36  
37  
38  
39  
40  
41  
42  
43  
44  
45  
46  
47  
48  
49  
50  
51  
52  
53  
54  
55  
56  
57  
58  
59  
60

1  
2  
3 **16 Abstract**

4  
5 **17 Objectives:** The WHO proposed intrinsic capacity (IC) as a new model to capture an individual's  
6  
7  
8 **18** functions and capacities across lifetime. We aimed to investigate the prevalence of and factors  
9  
10 **19** associated with decline in IC (DIC) and examine associations between IC and adverse outcomes  
11  
12 **20** in China.

13  
14 **21 Design:** Cross-sectional study.

15  
16 **22 Setting:** Community, China.

17  
18 **23 Participants:** Data were derived from the China Comprehensive Geriatric Assessment Study. IC  
19  
20  
21  
22  
23  
24  
25  
26  
27  
28  
29  
30  
31  
32  
33  
34  
35  
36  
37  
38  
39  
40  
41  
42  
43  
44  
45  
46  
47  
48  
49  
50  
51  
52  
53  
54  
55  
56  
57  
58  
59  
60  
**24** comprised five domains: locomotion, cognition, vitality, sensory, and psychological domains.  
**25** Participants were deemed DIC if they had any domain decline(s). Sociodemographic  
**26** characteristics, chronic diseases, geriatric syndromes, and adverse outcomes were examined.

**27 Results:** Of 5,823 community-dwelling participants aged 60–98 years, 2,506 were DIC (weighted  
**28** 39.9%): 57.7% in Western, 38.3% in Northern, 33.7% in Northwest, 36.1% in Middle, 16.9% in  
**29** Eastern, and 19.8% in Northeast China. Participants with decline in locomotion, cognition, vitality,  
**30** sensory, and psychological domains numbered 1,039 (17.8%), 646 (11.1%), 735 (12.6%), 824  
**31** (14.2%), and 713 (12.2%), respectively. Age, northern residence, low education, poor marital  
**32** status, low income, less exercise, less meat intake, insomnia, memory loss, urinary incontinence,  
**33** constipation, slowness, chronic obstructive pulmonary disease, and osteoarthritis independently  
**34** influenced DIC. After adjusting for age, sex, area, district, marriage, education, waist-hip ratio,  
**35** smoking, alcohol consumption, exercise, income, and chronic diseases, DIC was independently  
**36** associated with risk of frailty, disability, fall, fracture, and immobility.

**37 Conclusion:** DIC prevalence in China is high. IC was significantly associated with adverse  
**38** outcomes, after adjusting for related variables. Efforts promoting IC to delay functional

1  
2  
3 39 dependence should focus on modifiable factors, such as worse social factors, poor lifestyle, chronic  
4  
5 40 diseases, and geriatric syndromes.  
6  
7  
8 41

9  
10 42 **Keywords:** Intrinsic capacity; Older Adults; Prevalence; Frailty  
11  
12 43

13  
14  
15 44  
16  
17  
18  
19  
20  
21  
22  
23  
24  
25  
26  
27  
28  
29  
30  
31  
32  
33  
34  
35  
36  
37  
38  
39  
40  
41  
42  
43  
44  
45  
46  
47  
48  
49  
50  
51  
52  
53  
54  
55  
56  
57  
58  
59  
60

For peer review only

1  
2  
3 45 **Article summary**  
4

5 46 **Strengths and limitations of this study**  
6

- 7  
8 47 ● To the best of our knowledge, this study is the first large nationally representative sample of  
9  
10 48 population-based older people focusing on intrinsic capacity in China.  
11  
12 49 ● Most of the indicators of intrinsic capacity such as locomotion, cognition, and psychological  
13  
14 50 domain were assessed by unified measured performance tests.  
15  
16  
17 51 ● This study provided preliminary understanding of the intrinsic capacity situation in China,  
18  
19 52 which suggests ways to successfully put intrinsic capacity into clinical practice to contribute  
20  
21 53 to complex integrated care strategies for older persons with declined intrinsic capacity.  
22  
23  
24 54 ● The relatively small sample size and cross-sectional design limit generalizability of the results  
25  
26 55 ● We used a composite total score instead of a weighted score, so further statistical approaches  
27  
28 56 should be conducted to compute IC score.  
29  
30  
31 57

## 58 Introduction

59 The increasing global disability burden associated with rapid population aging causes physical,  
60 social, and mental health problems, which challenges the health care system for older people <sup>1</sup>. To  
61 cope with the demands of increasing numbers of frail community-dwelling older persons with  
62 multiple complex needs, implementing integrated care is necessary to improve their well-being <sup>2</sup>.  
63 As such, the World Health Organization (WHO) has developed the Integrated Care for Older  
64 People (ICOPE) approach and proposed an innovative public health model for healthy ageing  
65 focusing on concepts of intrinsic capacity (IC) and functional ability, with strong recommendations  
66 for developing comprehensive approaches such as quality integrated care to maintain IC and  
67 functional ability. This highlights the importance of integrated care in improving quality of life in  
68 the older population <sup>3,4</sup>. A recent study showed that an integrated health and social care model  
69 reduced frailty in community-dwelling older people <sup>5</sup>.  
70 IC comprises all the individual's physical and mental capacities <sup>4</sup>. The new IC model has shifted  
71 the concept of "healthy ageing" from disease-centered to function-centered paradigms, which  
72 opens up opportunities for intervention at an early stage to slow down progression to disability and  
73 care-dependency. WHO proposes five components to assess IC: locomotion, cognition, vitality,  
74 sensory, and psychological domains <sup>3,4</sup>. Although each component is associated with adverse  
75 health events in older people, few studies have focused on the combined components <sup>6,7</sup>. As it  
76 reflects biological aging, monitoring IC may provide an innovative method to promote healthy  
77 ageing <sup>8</sup>. While evidence about factors associated with decline in IC (DIC) is limited, with  
78 increased healthcare utilization, identification of vulnerable populations at risk and further  
79 intervention could improve their physical capacity and functional ability <sup>4</sup>.  
80 While disease burden affects public health systems and increases expenses, an IC approach might



1  
2  
3 81 allow a better understanding of an individual's functional trajectories and vulnerabilities to  
4  
5 82 develop strategies for prevention or to delay progression of DIC, even during a catastrophic event  
6  
7  
8 83 as the coronavirus disease <sup>9</sup>. The healthcare system should prioritize strategies targeting chronic  
9  
10 84 diseases in the older population to reduce the disabilities burden <sup>10</sup>. Although the concept of IC  
11  
12 85 has been used in several observational studies <sup>11</sup>, no studies have been conducted in China.  
13  
14 86 Therefore, to facilitate the evaluation of integrated primary care approaches for older patients, the  
15  
16 87 present study focuses on (1) the prevalence and factors associated with DIC proposed by the WHO,  
17  
18 88 and (2) the association between IC and frailty, disability, falls, fracture, and immobility in  
19  
20 89 community-dwelling older people in China.  
21  
22  
23  
24  
25

## 26 91 **Methods**

### 27 92 *Participants*

28  
29  
30 93 Data were obtained from the China Comprehensive Geriatric Assessment Study (CCGAS, 2011–  
31  
32 94 2012), a population-based face-to-face survey of adults aged 60 years or over from rural and urban  
33  
34 95 areas of China. Further details regarding the CCGAS have been reported. Briefly, seven cities  
35  
36 96 (Beijing, Xi'an, Harbin, Chengdu, Chongqing, Changsha, and Shanghai) from seven different  
37  
38 97 provinces were chosen based on well-established cluster, stratification, and random selection  
39  
40 98 statistical sampling techniques; these cities represent six main regions in China (northern, middle,  
41  
42 99 eastern, northwestern, southwestern, and northeastern). A total of 6,867 older adults were included,  
43  
44  
45  
46 100 and 1,040 participants were excluded because of missing data, resulting in 5,823 with complete IC  
47  
48 101 data included in this analysis. All study participants provided informed consent, and the study  
49  
50 102 design was approved by the ethics review board of Xuanwu Hospital Capital Medical University.  
51  
52  
53

### 54 103 *Demographics, lifestyles, and diseases*

55  
56  
57  
58  
59  
60

1  
2  
3 104 A door-to-door survey was conducted by formally trained interviewers using the standard  
4  
5 105 Comprehensive Geriatric Assessment (CGA) instrument. Data gathered included  
6  
7 106 sociodemographic characteristics, anthropometric measurements, health status, personal habits,  
8  
9 107 and mental health. Medical conditions such as self-reported history of chronic disease diagnosed  
10  
11 108 by a doctor and geriatric syndromes were recorded.

14  
15 109 *IC construct*

16  
17 110 IC was assessed by the following five domains recommended by WHO <sup>3,12</sup> and available in our  
18  
19 111 cohort.

20  
21 112 Locomotion was assessed by a short physical performance battery <sup>13</sup>. The balance test comprises  
22  
23 113 three parts: standing unsupported for 10 seconds with the feet together; a semi-tandem stand; and  
24  
25 114 a full-tandem stand. Subjects who were unable to complete each test received a score of 1;  
26  
27 115 otherwise, they were scored 0. The chair-stand test was performed with the subject seated in a  
28  
29 116 chair, with the feet flat on the floor and arms held flat against their side with the elbows at 90°.  
30  
31 117 Subjects who were able to stand five times from the chair received a score of 1, those who partly  
32  
33 118 completed this task scored 0.5, and those who could not do so scored 0. A 20-meter walking test  
34  
35 119 was also conducted; those who were able to walk 20 meters scored 1, those who walked less than  
36  
37 120 20 meters scored 0.5, and those could not walk scored 0.

38  
39 121 Cognition was assessed by the Mini-Mental State Examination, with a total score range of 0–30  
40  
41 122 <sup>14</sup>. The thresholds for participants who were illiterate or who were educated up to elementary  
42  
43 123 school, middle school, and high school or above were 17, 20, and 24, respectively. Participants  
44  
45 124 who scored below the threshold value for their education group were regarded as mildly  
46  
47 125 cognitively impaired (score of 1), and those below 15 were regarded as moderately to severely  
48  
49 126 cognitively impaired (score of 0).

1  
2  
3 127 Vitality was assessed by body mass index (BMI), which was calculated by dividing the weight in  
4  
5 128 kilograms by height in meters squared. BMI cutoffs were based on Asian adjustments. BMI above  
6  
7 129  $20\text{kg/m}^2$  received a score of 2,  $18.5\text{--}20\text{ kg/m}^2$  was scored 1, and  $\leq 18.5\text{ kg/m}^2$  was scored 0.

10 130 Sensory domain was assessed by self-reported visual and hearing impairment. Vision capacity was  
11  
12 131 considered intact when the older person did not report “eyesight problems” that interfered with  
13  
14 132 their activities, and they were not identified by the interviewer as being functionally blind. Hearing  
15  
16 133 capacity was considered intact when the older person did not report “hearing problems or deafness”  
17  
18 134 that interfered with their activities, and they were not identified by the interviewer as being  
19  
20 135 profoundly deaf. Participants with both vision and hearing impairments received a score of 0, those  
21  
22 136 with either vision or hearing impairment received a score of 1, and those with both vision and  
23  
24 137 hearing capacities intact scored 2.

28 138 Psychological domain was measured by the 30-item Geriatric Depression Scale<sup>15</sup>. Scores from 0  
29  
30 139 to 10 represent an intact psychological domain (score of 2); scores from 11 to 20 represent mild  
31  
32 140 depression (score of 1); scores from 21 to 60 represent moderate to severe depression (score of 0).  
33  
34 141 For each of the above five items, participants were scored either 0 (representing severe decline), 1  
35  
36 142 (representing mild decline), or 2 (representing intact IC). The IC total score ranged from 0–10;  
37  
38 143 higher scores indicated better performance.

#### 144 *Adverse outcomes*

145 Physical function was assessed as activities of daily living (ADL) and instrumental activities of  
146  
147 146 daily living (IADL). The list of activities consisted of 14 items (eating, grooming, dressing,  
148  
149 147 transferring in and out of bed, bathing, walking inside the house, using the toilet, cooking,  
150  
151 148 managing finances, driving or using public transportation, shopping, walking 250 meters, cutting  
152  
153 149 toenails, and climbing stairs), and an individual’s performance on each item was classified as

1  
2  
3 150 independent, partially dependent, or completely dependent. Those with one or more impaired ADL  
4  
5 151 or IADL functions were defined as disabled. The frailty index derived from CGA was measured  
6  
7 152 based on six variables: demographic characteristics, physical health, physical function, living  
8  
9 153 behavior and social function, mental health, and cognitive function <sup>16</sup>. Frailty was defined as a  
10  
11 154 score  $\geq 0.25$ . We defined fractures as spontaneous fractures over the previous two years. Falls were  
12  
13 155 defined as those that occurred twice in the past year. Immobility was self-reported.  
14

### 156 *Statistical methods*

157 EpiData was used to establish the database, and input and automatically verify the data. All  
18  
19 157  
20  
21 158 statistical analyses were performed using SPSS (Chicago, IL, USA, version 11.0). Count data were  
22  
23 159 expressed as percentages. Chi-square tests, t-tests, and one-way analysis of variance were  
24  
25 160 performed. The standard rates calculated using the national standard population composition ratio  
26  
27 161 as at the Sixth National Census (2010). A forward stepwise logistic regression was conducted to  
28  
29 162 explore the association between the factors and DIC or between DIC and adverse outcomes. A P-  
30  
31 163 value of  $< 0.05$  was considered statistically significant.  
32  
33  
34  
35  
36  
37

### 165 **Results**

38 165  
39  
40 166 Of the total 5,823 older adults, the average IC score was  $9.14 \pm 1.304$ , and 2,506 were DIC, yielding  
41  
42 167 a prevalence of 43.0% (weighted 39.9%). A total of 3,317 (57.0%), 1,512 (26.0%), 636 (10.9%),  
43  
44 168 271 (4.7%), 75(1.3%), and 12 (0.2%) participants showed decline in 0, 1, 2, 3, 4, and 5 domains,  
45  
46 169 respectively. The prevalence of DIC was higher in women than in men (43.0% vs. 36.7%). The  
47  
48 170 prevalence of DIC among older adults in rural areas was higher, by 1.36 times, than that in urban  
49  
50 171 areas. The prevalence of DIC increased with age, with the highest observed in individuals aged  
51  
52 172  $\geq 80$  y (66.6%) and the lowest among those aged 60–64 y (28.6%) (Table 1). The number of  
53  
54  
55  
56  
57  
58  
59  
60

1  
2  
3 173 participants with decline in locomotion, cognition, vitality, sensory, and psychological domains  
4  
5 174 was 1,039 (17.8%), 646 (11.1%), 735 (12.6%), 824 (14.2%), and 713 (12.2%), respectively. For  
6  
7  
8 175 each domain, the prevalence was higher in females and those with rural residence, and increased  
9  
10 176 with age, although there was no association between psychological domain and age (Table S1).  
11  
12 177 We observed differences in the prevalence of DIC among the six regions: 57.7% in Western China,  
13  
14 178 38.3% in Northern China, 33.7% in Northwest China, 36.1% in Middle China, 16.9% in Eastern  
15  
16 179 China, and 19.8% in Northeast China (Figure 1A). The prevalence of DIC was higher in northern  
17  
18 180 than southern regions (46.9% vs 36.7%; Figure 1B). The IC score decreased with increasing age  
19  
20 181 ( $9.53\pm 0.88$ ,  $49.37\pm 1.06$ ,  $9.18\pm 1.22$ ,  $8.96\pm 1.39$ ,  $8.35\pm 1.73$ ; Figure 1D) and was higher in men than  
21  
22 182 women ( $9.24\pm 1.19$  vs  $9.06\pm 1.38$ ; Figure 1C).  
23  
24  
25 183 Next, we observed the prevalence of DIC in different regions according to geography, sex, and  
26  
27 184 age. In urban areas, the weighted prevalence of DIC differed across the six regions, with western  
28  
29 185 urban regions showing the highest rates and eastern urban regions showing the lowest rates: 43.1%  
30  
31 186 in Western, 36.1% in Middle, 33.7% in Northwest, 30.7% in Northern, and 19.8% in Northeast,  
32  
33 187 and 11.8% in Eastern China. Older adults living in rural areas included those residing in Beijing  
34  
35 188 and Chengdu, and the prevalence of DIC was higher in Chengdu than Beijing (74.1% vs 47.2%).  
36  
37 189 The prevalence of DIC among the six regions was different when analyzed according to sex and  
38  
39 190 age, with western regions showing the highest rate in both men and women, and in those aged <75  
40  
41 191 y, and those aged  $\geq 75$  y, the eastern regions showing the lowest rates in both men and women, and  
42  
43 192 those aged <75 y, and east-north region showing the lowest rates in those aged  $\geq 75$  y (Figure 2).  
44  
45 193 When we compared social-psychological factors, chronic diseases, and geriatric syndromes, a high  
46  
47 194 prevalence of DIC was observed in illiterate participants, those with low income, not married, who  
48  
49 195 did not exercise, with less meat intake and alcohol consumption. Those who had chronic diseases  
50  
51  
52  
53  
54  
55  
56  
57  
58  
59  
60

1  
2  
3 196 such as coronary heart disease, stroke, kidney disease, chronic obstructive pulmonary disease, and  
4  
5 197 osteoarthritis, as well as geriatric syndromes had a higher prevalence of DIC, while there was a  
6  
7 198 lower prevalence of DIC in older adults without diabetes (Table S2). The prevalence of DIC among  
8  
9  
10 199 individuals with  $\geq 5$  (62.5%) chronic diseases was about two times higher than that among  
11  
12 200 individuals without chronic disease (30.9%).

13  
14 201 With DIC as the dependent variable and the above factors as independent variables, forward  
15  
16 202 logistic analysis showed that older age, northern region, low education, poor marital status, low  
17  
18 203 income, less exercise, less meat intake, insomnia, memory decline, urinary incontinence,  
19  
20 204 constipation, slowness, chronic obstructive pulmonary disease, and osteoarthritis, were  
21  
22 205 independent factors influencing DIC in older adults (Table 2).

23  
24 206 We further compared the frequency of adverse clinical outcomes between non-DIC and DIC  
25  
26 207 groups. Participants with DIC were much more likely to be frail (22.2% vs 1.2%), disabled (15.0%  
27  
28 208 vs 1.0%), and have falls (7.9% vs 1.8%), fractures (4.7% vs 2.2%), and immobility (20.4% vs  
29  
30 209 3.4%). Logistic regression showed that, after adjustment for age, sex, area, district, marriage,  
31  
32 210 education, waist-hip ratio, smoking, alcohol consumption, exercise, income, and chronic diseases,  
33  
34 211 DIC was independently associated with risks of frailty (adjusted OR = 19.021), disability (adjusted  
35  
36 212 OR = 8.611), falls (adjusted OR = 3.053), fractures (adjusted OR = 1.656), and immobility  
37  
38 213 (adjusted OR = 4.403) (Table 3).

39  
40  
41  
42  
43  
44 214

## 45 215 **Discussion**

46  
47 216 In a nationally representative cross-sectional study, the weighted prevalence of DIC was as high  
48  
49 217 as 39.9% in community-living Chinese adults aged  $\geq 60$  years, which was about five times higher  
50  
51 218 than the prevalence of frailty in the same population<sup>17</sup>. The frequency of participants with decline  
52  
53  
54  
55  
56  
57  
58  
59  
60

1  
2  
3 219 in locomotion, cognition, vitality, sensory, and psychological domains was 17.8%, 11.1%, 12.6%,  
4  
5 220 14.2%, and 12.2%, respectively. The traditional care model for older adults is mostly disease-  
6  
7 221 centered; however, frailty, as an increasingly problematic consequence of population aging,  
8  
9  
10 222 threatens the sustainability of healthcare resources where most people seek healthcare attention  
11  
12 223 only when experiencing symptoms. Furthermore, some studies reported that current integrated  
13  
14 224 care models did not significantly reduce utilization nor consistently reduce mortality<sup>18</sup>. Thus, an  
15  
16 225 IC model may support modernization of current healthcare systems and meet the requirements of  
17  
18 226 each older adult. The ongoing INSPIRE study conducted in Europe will test the implementation  
19  
20 227 and follow up of the ICOPE tool<sup>19</sup>.  
21  
22  
23 228 This study showed the prevalence of DIC participants was higher in northern than southern regions.  
24  
25 229 Furthermore, there were differences in the prevalence of DIC among the six regions, which was  
26  
27 230 consistent with previous studies in which the incidence of frailty<sup>20</sup> and prevalence of disability<sup>21</sup>  
28  
29 231 was more common in the north than the south, indicating the importance of implementing the  
30  
31 232 ICOPE protocol, especially in northern China. We found that IC score decreased with increasing  
32  
33 233 age, while longitudinal studies showed that the effect of age on incidence of ADL dependency was  
34  
35 234 modified by IC<sup>22</sup>.  
36  
37  
38 235 Logistic regression showed that age, region, low education, poor marital status, low income, less  
39  
40 236 exercise, less meat intake, insomnia, memory loss, urinary incontinence, constipation, slowness,  
41  
42 237 chronic obstructive pulmonary disease, and osteoarthritis were independent factors influencing  
43  
44 238 DIC in older adults, which shows that efforts to develop strategies and health policies to  
45  
46 239 identify and manage modifiable variables are urgently needed. A longitudinal study in New  
47  
48 240 Zealand showed that neighborhood environments and IC interact to affect quality of life in older  
49  
50 241 persons<sup>23</sup>. Since the above associated factors independently affected the persons' IC, multidomain  
51  
52  
53  
54  
55  
56  
57  
58  
59  
60

1  
2  
3 242 and complex interventions provide a better option for prevention and management of DIC.  
4  
5 243 Accordingly, WHO recommends screening using instruments such as the ICOPE screening tool  
6  
7 244 as the first step at the primary care level <sup>3,4,24</sup>.

8  
9  
10 245 We showed that after adjusting for sociodemographic variables, age-related factors, and chronic  
11  
12 246 conditions, DIC was independently associated with risk of frailty, disability, falls, fractures, and  
13  
14 247 immobility, which is in line with the finding that IC predicted the incidence of loss of ADLs and  
15  
16 248 IADLs <sup>22</sup>, and further indicates the need for worldwide implementation of prevention of DIC. The  
17  
18 249 World Report on Ageing and Health proposes the concept of IC as central for healthy ageing <sup>4</sup>.  
19  
20 250 The term frailty refers to health deficits while IC emphasizes positive aspects and perhaps includes  
21  
22 251 the biological state that underpins the frailty phenotype. Thus, IC may be considered as an  
23  
24 252 evolution of frailty by creating a bridge between geroscience and healthy aging <sup>11</sup>. Furthermore,  
25  
26 253 an IC approach has the benefit of tracing trajectories for progression to adverse clinical outcomes  
27  
28 254 such as frailty and disability, as well as the effectiveness of interventions implemented at the  
29  
30 255 individual level. Thus, an IC model is of great importance in the face of unmet needs.

31  
32  
33 256 This study has several limitations. First, the relatively small sample size and cross-sectional design  
34  
35 257 limit generalizability of the results. Further longitudinal studies with a larger sample size are  
36  
37 258 urgently needed. Second, vitality was defined by BMI instead of specific nutritional assessment,  
38  
39 259 which may have affected some of the results, since most of the diabetic patients had a higher BMI,  
40  
41 260 which could explain the lower DIC in participants with diabetes in the study. Third, we used a  
42  
43 261 composite total score instead of a weighted score, so further statistical approaches should be  
44  
45 262 conducted to compute IC score.

46  
47 263 To the best of our knowledge, this study is the first large nationally representative sample of  
48  
49 264 population-based older people focusing on IC in China. Second, most of the indicators of IC such  
50  
51  
52  
53  
54  
55  
56  
57  
58  
59  
60



1  
2  
3 265 as locomotion, cognition, and psychological domain were assessed by unified measured  
4  
5 266 performance tests; thus, response or interviewer bias was avoided. Third, standardized protocols  
6  
7  
8 267 as well as regularly and randomly performed internal quality checks of the data were used to avoid  
9  
10 268 the quality disadvantage of the multi-center design.

11  
12 269 The current study provided preliminary understanding of the IC situation in China, which suggests  
13  
14 270 ways to successfully put IC into clinical practice to contribute to complex integrated care strategies  
15  
16  
17 271 for older persons with DIC. This study has the potential to enhance our understanding of the  
18  
19 272 importance and promising future of an IC model of disease and treatment effects in this vulnerable  
20  
21 273 population. Consistent with the WHO recommendations, this study indicates screening and  
22  
23 274 interventions should be provided, especially for vulnerable participants. As such, China has  
24  
25 275 already put the theory-based ICOPE approach into clinical practice and launched a pilot multi-  
26  
27 276 center study called “China Aging, Resilience and Intrinsic Capacity Study (CARICS)” to identify  
28  
29  
30 277 and manage DIC to improve well-being among community-living older adults.

31  
32  
33 278  
34  
35  
36  
37  
38  
39  
40  
41  
42  
43  
44  
45  
46  
47  
48  
49  
50  
51  
52  
53  
54  
55  
56  
57  
58  
59  
60

1  
2  
3 279 **Funding:** This work was supported by the following grants: National Key R&D Program of China  
4  
5 280 (2018YFC1312001), the National Natural Science Foundation of Beijing (7202059), Beijing  
6  
7 281 Municipal Hospital Scientific Research Training Project (PX2020036), and Milstein Medical  
8  
9 282 Asian American Partnership Foundation Project Award in Geriatrics (2018).

10  
11 283 **Acknowledgments:** We acknowledge all the people who participated in the CCGAS from the  
12  
13 284 following hospitals: Xuanwu Hospital, Beijing Hospital, Beijing Institute of Geriatrics, General  
14  
15 285 Hospital of PLA, Peking University Third Hospital, The First Affiliated Hospital of Xi'an Jiaotong  
16  
17 286 University, Xijing Hospital of The Fourth Military Medical University, The First Affiliated  
18  
19 287 Hospital of Harbin Medical University, West China Hospital of Sichuan University, First  
20  
21 288 Affiliated Hospital of Chongqing Medical University, Xiangya Hospital of Central South  
22  
23 289 University, The Third Xiangya Hospital of Central South University, and Ruijin Hospital of  
24  
25 290 Shanghai Jiao Tong University School of Medicine.

26  
27 291 **Author contributions:** LM and ZT conceived of the research, reviewed related literature, oversaw  
28  
29 292 analysis and was responsible for final drafting of the paper. JC, FS, LZ and YL contributed to  
30  
31 293 conceptualisation, reviews of related literature and drafting of the paper. All authors reviewed and  
32  
33 294 approved the final manuscript submitted for publication.

34  
35 295 **Data sharing statement:** No additional data are available.

36  
37 296 **Conflict of interest:** None declared.

38  
39 297 **Patient consent for publication:** Not required.

40  
41 298 **Ethical approval:** All study participants provided informed consent, and the study design was  
42  
43 299 approved by the ethics review board of Xuanwu Hospital Capital Medical University.

44  
45 300

301 **References**

- 302 1. Prince MJ, Wu F, Guo Y, et al. The burden of disease in older people and implications for  
303 health policy and practice. *Lancet*. 2015;385(9967):549–62.
- 304 2. Stoop A, Lette M, Ambugo EA, et al. Improving Person-Centredness in Integrated Care for  
305 Older People: Experiences from Thirteen Integrated Care Sites in Europe. *Int J Integr Care*  
306 [Internet] 2020 [cited 2020 Jul 3];20(2):16. Available from:  
307 <https://www.ijic.org/article/10.5334/ijic.5427/>
- 308 3. Integrated Care for Older People: Guidelines on Community-Level Interventions to Manage  
309 Declines in Intrinsic Capacity [Internet]. 2017 [cited 2020 Jul 3]; Available from:  
310 <https://pubmed.ncbi.nlm.nih.gov/29608259/>
- 311 4. World Health Organization. Ageing and health [Internet]. 2018 [cited 2018 Jun  
312 23]; Available from: <http://www.who.int/news-room/fact-sheets/detail/ageing-and-health>
- 313 5. Ruby Yu, Cecilia Tong JW. Effect of an integrated care model for pre-frail and frail older  
314 people living in community. *Age Ageing* [Internet] 2020 [cited 2020 Jul 3]; Available from:  
315 [https://academic.oup.com/ageing/article-](https://academic.oup.com/ageing/article-abstract/doi/10.1093/ageing/afaa087/5848668?redirectedFrom=fulltext)  
316 [abstract/doi/10.1093/ageing/afaa087/5848668?redirectedFrom=fulltext](https://academic.oup.com/ageing/article-abstract/doi/10.1093/ageing/afaa087/5848668?redirectedFrom=fulltext)
- 317 6. Framework Implementation of the INSPIRE ICOPE-CARE Program in Collaboration with  
318 the World Health Organization (WHO) in the Occitania Region. *J Frailty Aging* 2020;1–7.
- 319 7. Alexia Charles, Fanny Buckinx, Médéa Locquet, Jean-Yves Reginster, Jean Petermans,  
320 Bastien Gruslin OB. Prediction of Adverse Outcomes in Nursing Home Residents  
321 According to Intrinsic Capacity Proposed by the World Health Organization | *The Journals*  
322 *of Gerontology: Series A* | Oxford Academic. *J Gerontol A Biol Sci Med Sci* [Internet] 2019  
323 [cited 2020 Jun 15]; Available from:

- 1  
2  
3 324 [https://academic.oup.com/biomedgerontology/advance-article-](https://academic.oup.com/biomedgerontology/advance-article-abstract/doi/10.1093/gerona/glz218/5575908?redirectedFrom=fulltext)  
4  
5 325 [abstract/doi/10.1093/gerona/glz218/5575908?redirectedFrom=fulltext](https://academic.oup.com/biomedgerontology/advance-article-abstract/doi/10.1093/gerona/glz218/5575908?redirectedFrom=fulltext)  
6  
7  
8 326 8. Cesari M, Araujo de Carvalho I, Amuthavalli Thiyagarajan J, et al. Evidence for the  
9  
10 327 Domains Supporting the Construct of Intrinsic Capacity. *Journals Gerontol Ser A* [Internet]  
11  
12 328 2018 [cited 2018 Jun 22]; Available from:  
13  
14 329 [https://academic.oup.com/biomedgerontology/advance-](https://academic.oup.com/biomedgerontology/advance-article/doi/10.1093/gerona/gly011/4834876)  
15  
16 330 [article/doi/10.1093/gerona/gly011/4834876](https://academic.oup.com/biomedgerontology/advance-article/doi/10.1093/gerona/gly011/4834876)  
17  
18  
19 331 9. Nestola T, Orlandini L, Beard JR, Cesari M. Covid-19 and Intrinsic Capacity. *J Nutr Heal*  
20  
21 332 *Aging* [Internet] 2020 [cited 2020 Jul 3];1–4. Available from:  
22  
23 333 <https://doi.org/10.15585/mmwr.mm6912e2>.  
24  
25  
26 334 10. Zhou M, Wang H, Zeng X, et al. Mortality, morbidity, and risk factors in China and its  
27  
28 335 provinces, 1990–2017: a systematic analysis for the Global Burden of Disease Study 2017.  
29  
30 336 *Lancet* [Internet] 2019 [cited 2020 Jul 3];394(10204):1145–58. Available from:  
31  
32 337 <https://pubmed.ncbi.nlm.nih.gov/31248666/>  
33  
34  
35 338 11. Barreto P de S, Guyonnet S, Ader I, et al. The Inspire Research Initiative: A Program for  
36  
37 339 Geroscience and Healthy Aging Research going from Animal Models to Humans and the  
38  
39 340 Healthcare System. *J Frailty Aging* [Internet] 2020 [cited 2020 Jun 25];1–8. Available from:  
40  
41 341 <https://link.springer.com/article/10.14283/jfa.2020.18>  
42  
43  
44 342 12. WHO | Meeting of the Clinical Consortium on *Healthy Ageing*. WHO 2018;  
45  
46  
47 343 13. Guralnik JM, Simonsick EM, Ferrucci L, et al. A Short Physical Performance Battery  
48  
49 344 Assessing Lower Extremity Function: Association With Self-Reported Disability and  
50  
51 345 Prediction of Mortality and Nursing Home Admission. *J Gerontol* [Internet] 1994 [cited  
52  
53 346 2018 Aug 18];49(2):M85–94. Available from: <https://academic.oup.com/geronj/article->

- 1  
2  
3 347 lookup/doi/10.1093/geronj/49.2.M85  
4  
5 348 14. Li H, Jia J, Yang Z. Mini-Mental State Examination in Elderly Chinese: A Population-  
6  
7 349 Based Normative Study. *J Alzheimers Dis* [Internet] 2016 [cited 2018 Nov 16];53(2):487–  
8  
9 350 96. Available from:  
10  
11 351 <http://www.medra.org/servlet/aliasResolver?alias=iospress&doi=10.3233/JAD-160119>  
12  
13  
14 352 15. Chan ACM. Clinical validation of the Geriatric Depression Scale (GDS): Chinese version.  
15  
16 353 *J Aging Health* 1996;8(2):238–53.  
17  
18 354 16. Ma L, Zhang L, Tang Z, et al. Use of the frailty index in evaluating the prognosis of older  
19  
20 355 people in Beijing: A cohort study with an 8-year follow-up. *Arch Gerontol Geriatr*  
21  
22 356 2016;64(3):172–7.  
23  
24  
25 357 17. Ma L, Tang Z, Zhang L, Sun F, Li Y, Chan P. Prevalence of Frailty and Associated Factors  
26  
27 358 in the Community-Dwelling Population of China. *J Am Geriatr Soc* [Internet] 2018 [cited  
28  
29 359 2018 Apr 15];66(3):559–64. Available from:  
30  
31 360 <http://www.ncbi.nlm.nih.gov/pubmed/29168883>  
32  
33  
34 361 18. Kasteridis P, Mason A, Street A. Evaluating integrated care for people with complex needs.  
35  
36 362 *J Health Serv Res Policy* [Internet] 2020 [cited 2020 Jul 3];135581962093187. Available  
37  
38 363 from: <http://journals.sagepub.com/doi/10.1177/1355819620931872>  
39  
40  
41 364 19. Takeda C, Guyonnet S, Sumi Y, Vellas B, Araujo de Carvalho I. Integrated Care for Older  
42  
43 365 People and the Implementation in the INSPIRE Care Cohort [Internet]. *J. Prev. Alzheimer's*  
44  
45 366 *Dis.* 2020 [cited 2020 Jul 3];7(2):70–4. Available from:  
46  
47 367 <https://pubmed.ncbi.nlm.nih.gov/32236394/>  
48  
49  
50 368 20. Xu W, Li YX, Wu C. Incidence of frailty among community-dwelling older adults: A  
51  
52 369 nationally representative profile in China. *BMC Geriatr* 2019;19(1).  
53  
54  
55  
56  
57  
58  
59  
60

- 1  
2  
3 370 21. Ma L, Li Z, Tang Z, et al. Prevalence and socio-demographic characteristics of disability in  
4  
5 371 older adults in China: Findings from China Comprehensive Geriatric Assessment Study.  
6  
7 372 Arch Gerontol Geriatr [Internet] 2017;73:199–203. Available from:  
8  
9 373 <http://linkinghub.elsevier.com/retrieve/pii/S0167494316302813>  
10  
11  
12 374 22. Whiley L, Sen A, Heaton J, et al. Evidence of altered phosphatidylcholine metabolism in  
13  
14 375 Alzheimer’s disease. Neurobiol Aging [Internet] 2014 [cited 2018 Jun 28];35(2):271–8.  
15  
16 376 Available from: <http://www.ncbi.nlm.nih.gov/pubmed/24041970>  
17  
18  
19 377 23. Stephens C, Allen J, Keating N, Szabó Á, Alpass F. Neighborhood environments and  
20  
21 378 intrinsic capacity interact to affect the health-related quality of life of older people in New  
22  
23 379 Zealand. Maturitas 2020;139:1–5.  
24  
25  
26 380 24. WHO | Integrated care for older people (ICOPE): guidance for person-centred assessment  
27  
28 381 and pathways in primary care. WHO [Internet] 2020 [cited 2020 Jul 3];Available from:  
29  
30 382 <http://www.who.int/ageing/publications/icope-handbook/en/>  
31  
32

383

384

385

1  
2  
3 **386 Captions for Tables and Figures**  
4

5 387 Table 1. Prevalence of declines in intrinsic capacity in older adults by sex, area, and age

6  
7 388 Table 2. Stepwise forward logistic regression for associated factors with decline in intrinsic  
8  
9  
10 389 capacity

11  
12 390 Table 3. Multivariate logistic regression analysis (forward method) for DIC associated with risk  
13  
14  
15 391 of adverse clinical outcomes

16  
17 392 Figure 1. The intrinsic capacity in different region, age, and sex groups. (A) The comparison of  
18  
19 393 the weighted prevalence of DIC among the six regions of China (Chi-square test,  $p < 0.01$ ). (B)  
20  
21 394 The comparison of the weighted prevalence of DIC between North China and South China (Chi-  
22  
23 395 square test,  $p < 0.01$ ). (C) The comparison of the intrinsic capacity score among different age  
24  
25 396 groups (One-way ANOVA,  $p < 0.01$ ). (D) The comparison of the intrinsic capacity score between  
26  
27 397 males and females (t-test,  $p < 0.01$ ). Abbreviations: ANOVA, analysis of variance; DIC, decline  
28  
29 398 in intrinsic capacity; IC, intrinsic capacity.  
30  
31  
32

33 399 Figure 2. The weighted prevalence of declines in intrinsic capacity in community-dwelling older  
34  
35 400 adults living in the urban area (A1), rural area (A2), male (B1), female (B2),  $<75$  ys (C1) and  $\geq 75$   
36  
37 401 ys (C2). All were analyzed using the Chi-square test,  $p < 0.01$ .  
38  
39

40 402 Table S1. Prevalence of each declined domain in older adults by sex, area, and age

41  
42 403 Table S2. The effect of social factors, lifestyle and chronic conditions on DIC  
43  
44  
45  
46  
47  
48  
49  
50  
51  
52  
53  
54  
55  
56  
57  
58  
59  
60

**Table 1. Prevalence of declines in intrinsic capacity in older adults by sex, area, and age**

|                  | Total<br>n | DIC<br>n (%) | Weighted<br>(%) | Number of Declined Domains |            |           |          |         |         |
|------------------|------------|--------------|-----------------|----------------------------|------------|-----------|----------|---------|---------|
|                  |            |              |                 | 0                          | 1          | 2         | 3        | 4       | 5       |
| All sample       | 5823       | 2506(43.0)   | 39.9            | 3317(57.0)                 | 1512(26.0) | 636(10.9) | 271(4.7) | 75(1.3) | 12(0.2) |
| <b>Sex*</b>      |            |              |                 |                            |            |           |          |         |         |
| Male             | 2518       | 1030(40.9)   | 36.7            | 1488(59.1)                 | 652(25.9)  | 266(10.6) | 81(3.2)  | 27(1.1) | 4(0.2)  |
| Female           | 3305       | 1476(44.7)   | 43.0            | 1829(55.3)                 | 860(26.0)  | 370(11.3) | 190(5.7) | 48(1.5) | 8(0.2)  |
| <b>Area*</b>     |            |              |                 |                            |            |           |          |         |         |
| Urban            | 3494       | 1243(35.6)   | 32.7            | 2251(64.4)                 | 868(24.8)  | 275(7.9)  | 81(2.3)  | 18(0.5) | 1(0)    |
| Rural            | 2329       | 1263(54.2)   | 50.1            | 1066(45.8)                 | 644(27.7)  | 361(15.5) | 190(8.2) | 57(2.4) | 11(0.5) |
| <b>Age (ys)*</b> |            |              |                 |                            |            |           |          |         |         |
| 60-64            | 1471       | 428(29.1)    | 28.6            | 1043(70.9)                 | 309(21.0)  | 85(5.8)   | 30(2.0)  | 4(0.3)  | 0(0)    |
| 65-69            | 1179       | 414(35.1)    | 34.9            | 765(64.9)                  | 271(23.0)  | 100(8.5)  | 34(2.9)  | 9(0.8)  | 0(0)    |
| 70-74            | 1165       | 515(44.2)    | 43.6            | 650(55.8)                  | 337(28.9)  | 116(10.0) | 46(3.9)  | 16(1.4) | 0(0)    |
| 75-79            | 1119       | 562(50.2)    | 50.3            | 557(49.8)                  | 325(29.0)  | 150(13.4) | 62(5.5)  | 20(1.8) | 5(0.4)  |
| ≥80              | 889        | 587(66.0)    | 66.6            | 302(34.0)                  | 270(30.4)  | 185(20.8) | 99(11.1) | 26(2.9) | 7(0.8)  |

Note: \*P<0.05; DIC, decline in intrinsic capacity



**Table 2. Stepwise forward logistic regression for associated factors with decline in intrinsic capacity**

| Factors              | B      | S.E.  | Wald    | df | Sig    | OR    | 95% CI      |
|----------------------|--------|-------|---------|----|--------|-------|-------------|
| Older age            | 0.647  | 0.093 | 48.426  | 1  | <0.001 | 1.910 | 1.592-2.291 |
| North region         | 0.466  | 0.090 | 26.993  | 1  | <0.001 | 1.594 | 1.337-1.901 |
| Low education        | 0.890  | 0.143 | 38.657  | 1  | <0.001 | 2.435 | 1.839-3.223 |
| Poor marital status  | 0.395  | 0.105 | 14.157  | 1  | <0.001 | 1.485 | 1.209-1.825 |
| Low income           | 0.388  | 0.094 | 16.974  | 1  | <0.001 | 1.474 | 1.226-1.773 |
| Less exercise        | 0.293  | 0.099 | 8.690   | 1  | 0.003  | 1.340 | 1.103-1.628 |
| Less meat intake     | 0.260  | 0.089 | 8.532   | 1  | 0.003  | 1.296 | 1.089-1.543 |
| Insomnia             | 0.453  | 0.095 | 22.735  | 1  | <0.001 | 1.572 | 1.305-1.894 |
| Urinary incontinence | 0.680  | 0.209 | 10.605  | 1  | 0.001  | 1.974 | 1.311-2.973 |
| Constipation         | 0.408  | 0.126 | 10.605  | 1  | 0.001  | 1.504 | 1.175-1.924 |
| Memory decline       | 0.714  | 0.083 | 73.427  | 1  | <0.001 | 2.043 | 1.735-2.405 |
| Slowness             | 0.407  | 0.102 | 15.908  | 1  | <0.001 | 1.502 | 1.230-1.835 |
| COPD                 | 0.853  | 0.215 | 15.758  | 1  | <0.001 | 2.347 | 1.540-3.576 |
| Osteoarthritis       | 0.534  | 0.095 | 31.785  | 1  | <0.001 | 1.706 | 1.417-2.054 |
| Constant             | -2.028 | 0.104 | 379.542 | 1  | <0.001 | 0.132 |             |

Note: COPD, chronic obstructive pulmonary disease.

The variables not in the equation were sex, living areas, alcohol consumption, coronary heart disease, diabetes, stroke and kidney disease.

**Table 3. Multivariate logistic regression analysis (forward method) for DIC associated with risk of adverse clinical outcomes**

|            | Model 1 |               |         | Model 2 |               |         |
|------------|---------|---------------|---------|---------|---------------|---------|
|            | OR      | 95% CI        | P value | OR      | 95% CI        | P value |
| Frailty    | 19.625  | 14.044-27.423 | <0.001  | 19.021  | 12.882-28.084 | <0.001  |
| Disability | 12.628  | 8.750-18.225  | <0.001  | 8.661   | 5.925-12.660  | <0.001  |
| Fall       | 3.671   | 2.699-4.993   | <0.001  | 3.053   | 2.232-4.177   | <0.001  |
| Fracture   | 1.965   | 1.448-2.666   | <0.001  | 1.656   | 1.195-2.295   | 0.003   |
| Immobility | 6.098   | 4.903-7.584   | <0.001  | 4.403   | 3.500-5.538   | <0.001  |

Reference: Non-DIC.

Model 1: Adjusted by age, sex, area and district.

Model 2: Fully adjusted Cox proportional hazard analysis. Adjusted by age, sex, area, district, marriage, education, waist hip ratio, smoking, alcohol consuming, exercise, income, and chronic diseases.

Note: DIC, decline in intrinsic capacity.

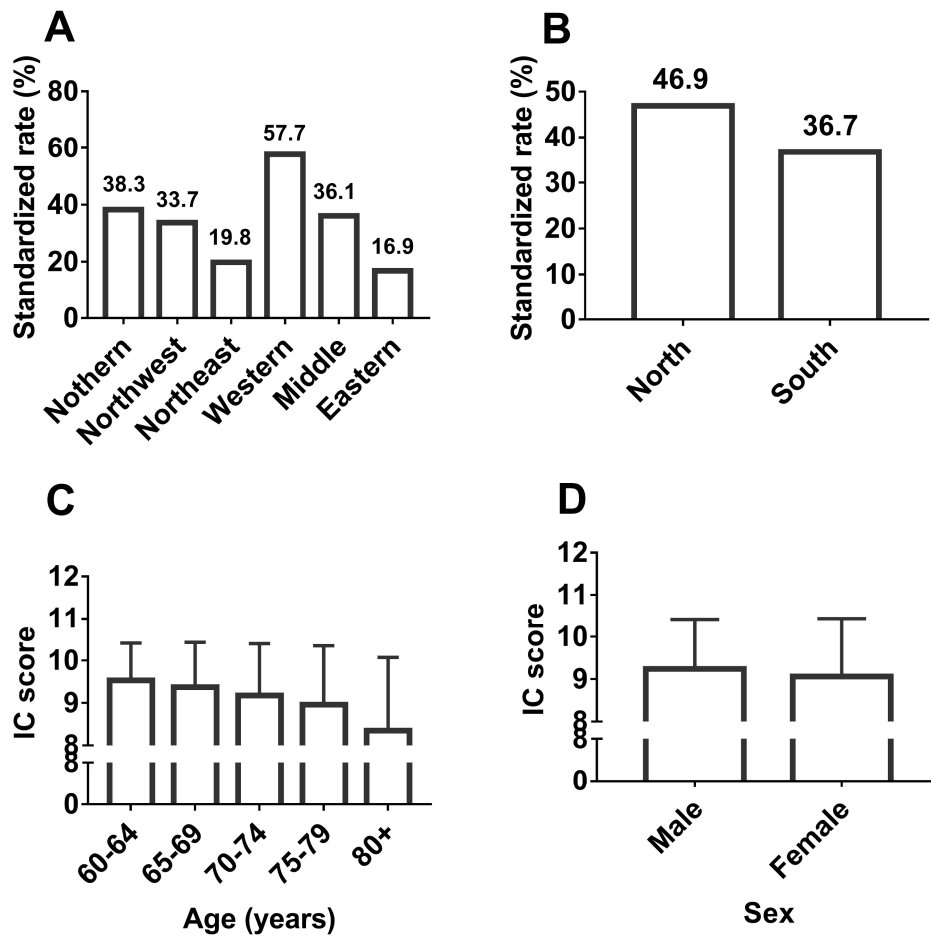

**A1**

**Urban**

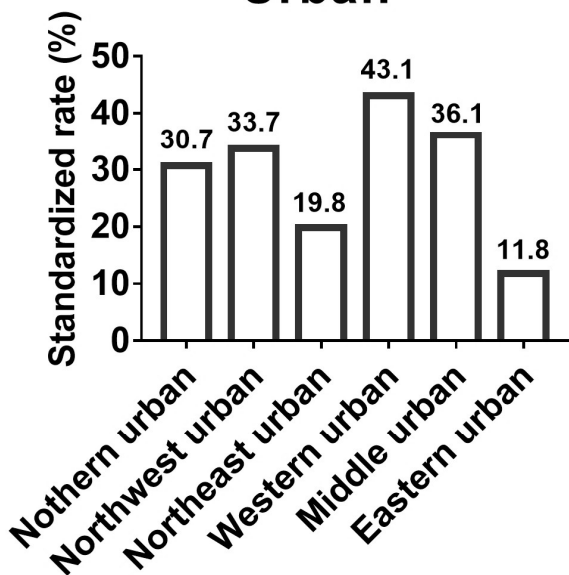

**A2**

**Rural**

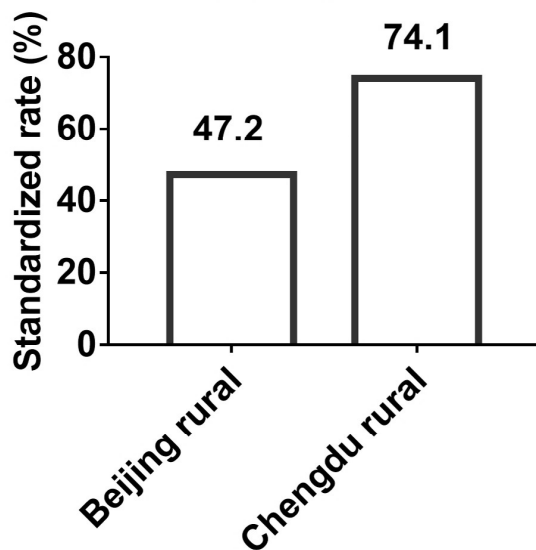

**B1**

**Male**

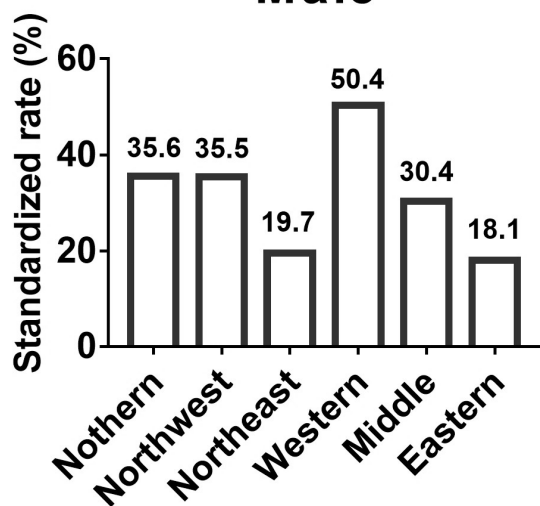

**B2**

**Female**

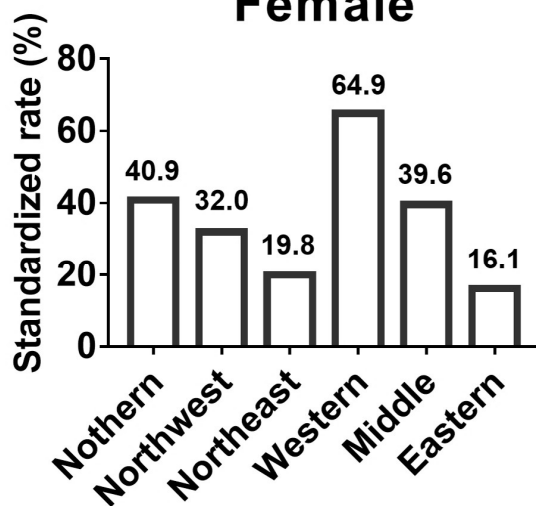

**C1**

**<75 ys**

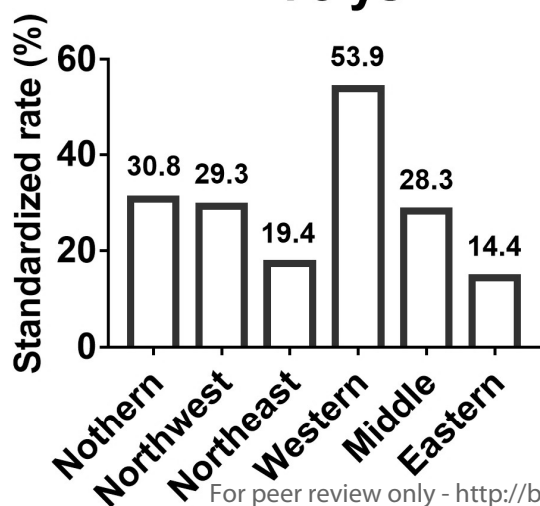

**C2**

**>=75 ys**

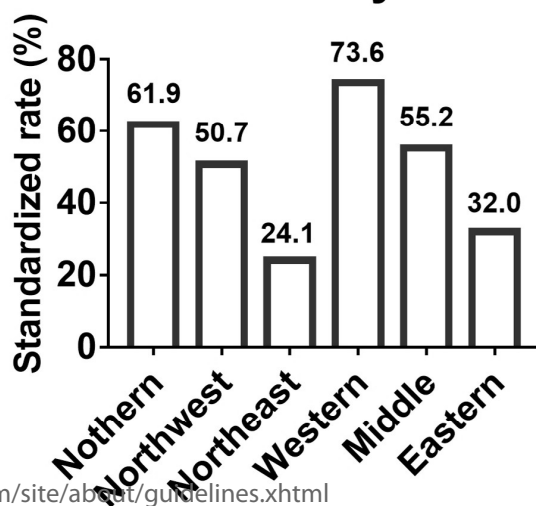

**Table S1. Prevalence of each declined domain in older adults by sex, area, and age**

|                 | Total | Locomotion | Cognition | Vitality  | Sensory    | Psychological |
|-----------------|-------|------------|-----------|-----------|------------|---------------|
| All sample      | 5823  | 1039(17.8) | 646(11.1) | 735(12.6) | 824(14.2)  | 713(12.2)     |
| <b>Sex</b>      |       |            |           |           |            |               |
| Male            | 2518  | 372(14.8)* | 227(9.0)* | 338(13.4) | 371(14.7)  | 247(9.8)*     |
| Female          | 3305  | 667(20.2)  | 419(12.7) | 397(12.0) | 453(55.0)  | 466(14.1)     |
| <b>Area</b>     |       |            |           |           |            |               |
| Urban           | 3494  | 481(14.1)* | 168(4.8)* | 344(9.8)* | 417(11.9)* | 318(9.1)*     |
| Rural           | 2329  | 548(23.5)  | 478(20.5) | 391(16.8) | 407(17.5)  | 395(17.0)     |
| <b>Age (ys)</b> |       |            |           |           |            |               |
| 60-64           | 1471  | 106(7.2)*  | 72(4.9)*  | 116(7.9)* | 114(7.7)*  | 177(12.0)     |
| 65-69           | 1179  | 129(10.9)  | 90(7.6)   | 123(10.4) | 131(11.1)  | 136(11.5)     |
| 70-74           | 1165  | 197(16.9)  | 123(10.6) | 141(12.1) | 166(14.2)  | 144(12.4)     |
| 75-79           | 1119  | 256(22.9)  | 158(14.1) | 154(13.8) | 210(18.8)  | 138(12.3)     |
| ≥80             | 889   | 351(39.5)  | 203(22.8) | 201(22.6) | 203(22.8)  | 118(13.3)     |

Note: Data were expressed as n (%); \*P<0.05

**Table S2. The effect of social factors, lifestyle and chronic conditions on DIC**

|                            | Total | DIC, n (%) | Weighted (%) | $\chi^2$ | <i>P</i> |
|----------------------------|-------|------------|--------------|----------|----------|
| <b>Social factors</b>      |       |            |              |          |          |
| <b>Education</b>           | 5823  |            |              |          |          |
| Illiterate                 | 1047  | 724(69.1)  | 67.7         | 355.086  | <0.001   |
| Not illiterate             | 4776  | 1782(37.3) | 34.9         |          |          |
| <b>Monthly income</b>      | 5665  |            |              |          |          |
| <2000 Yuan                 | 2658  | 1408(53.0) | 49.6         | 227.561  | <0.001   |
| ≥2000 Yuan                 | 3007  | 996(33.1)  | 30.0         |          |          |
| <b>Marital status</b>      | 5818  |            |              |          |          |
| Married                    | 4493  | 1738(38.7) | 35.8         | 151.541  | <0.001   |
| Windowed                   | 1325  | 765(57.7)  | 56.8         |          |          |
| <b>Lifestyle</b>           |       |            |              |          |          |
| <b>Exercise</b>            | 5808  |            |              |          |          |
| Yes                        | 4594  | 1779(38.7) | 36.1         | 168.600  | <0.001   |
| No                         | 1214  | 722(59.5)  | 55.0         |          |          |
| <b>Meat intake</b>         | 5823  |            |              |          |          |
| Usually                    | 3369  | 1322(39.2) | 35.9         | 46.925   | <0.001   |
| Less                       | 2454  | 1184(48.2) | 45.8         |          |          |
| <b>Alcohol consumption</b> | 5823  |            |              |          |          |
| Yes                        | 4503  | 600(45.5)  | 40.7         | 4.081    | 0.043    |
| No                         | 5823  | 1906(42.3) | 39.6         |          |          |
| <b>Smoking</b>             | 1320  |            |              |          |          |
| Yes                        | 1658  | 722(43.5)  | 38.7         | 0.241    | 0.623    |
| No                         | 4165  | 1784(42.8) | 40.5         |          |          |
| <b>Chronic disease</b>     |       |            |              |          |          |
| <b>Hypertension</b>        | 5823  |            |              |          |          |
| Yes                        | 2688  | 1127(41.9) | 39.0         | 2.505    | 0.113    |
| No                         | 3135  | 1379(44.0) | 40.7         |          |          |
| <b>CHD</b>                 | 5823  |            |              |          |          |
| Yes                        | 1168  | 559(47.9)  | 46.0         | 13.823   | <0.001   |
| No                         | 4655  | 1947(41.8) | 38.5         |          |          |
| <b>Diabetes</b>            | 5823  |            |              |          |          |
| Yes                        | 862   | 344(39.9)  | 36.6         | 4.041    | 0.044    |
| No                         | 4961  | 2162(43.6) | 40.5         |          |          |
| <b>Stroke</b>              | 5823  |            |              |          |          |
| Yes                        | 579   | 327(56.5)  | 53.3         | 47.323   | <0.001   |
| No                         | 5244  | 2179(41.6) | 38.5         |          |          |
| <b>Kidney disease</b>      | 5823  |            |              |          |          |
| Yes                        | 259   | 136(52.5)  | 50.6         | 9.907    | 0.002    |
| No                         | 5564  | 2370(42.6) | 39.4         |          |          |
| <b>COPD</b>                | 5823  |            |              |          |          |
| Yes                        | 205   | 140(68.3)  | 66.7         | 55.288   | <0.001   |
| No                         | 5618  | 2366(42.1) | 39.0         |          |          |
| <b>Liver disease</b>       | 5823  |            |              |          |          |
| Yes                        | 253   | 107(42.3)  | 40.0         | 0.062    | 0.803    |

|    |                             |      |            |      |         |        |
|----|-----------------------------|------|------------|------|---------|--------|
| 1  |                             |      |            |      |         |        |
| 2  |                             |      |            |      |         |        |
| 3  | No                          | 5570 | 2399(43.1) | 38.7 |         |        |
| 4  | <b>Osteoarthritis</b>       | 5823 |            |      |         |        |
| 5  | Yes                         | 1597 | 855(53.5)  | 51.2 | 98.993  | <0.001 |
| 6  | No                          | 4226 | 1651(39.1) | 35.9 |         |        |
| 7  |                             |      |            |      |         |        |
| 8  | <b>Cancer</b>               | 5823 |            |      |         |        |
| 9  | Yes                         | 148  | 63(42.6)   | 39.7 | 0.013   | 0.909  |
| 10 | No                          | 5675 | 2443(43.0) | 39.9 |         |        |
| 11 | <b>Geriatric syndrome</b>   |      |            |      |         |        |
| 12 | <b>Insomnia</b>             | 5823 |            |      |         |        |
| 13 | Yes                         | 1427 | 830(58.2)  | 56.5 | 176.113 | <0.001 |
| 14 | No                          | 4396 | 1676(38.1) | 34.9 |         |        |
| 15 |                             |      |            |      |         |        |
| 16 | <b>Memory decline</b>       | 5823 |            |      |         |        |
| 17 | Yes                         | 2629 | 1450(55.2) | 52.6 | 286.447 | <0.001 |
| 18 | No                          | 3194 | 1056(33.1) | 30.2 |         |        |
| 19 | <b>Urinary incontinence</b> | 5823 |            |      |         |        |
| 20 | Yes                         | 257  | 198(77.0)  | 76.3 | 126.654 | <0.001 |
| 21 | No                          | 5566 | 2308(41.5) | 38.5 |         |        |
| 22 |                             |      |            |      |         |        |
| 23 | <b>Constipation</b>         | 5823 |            |      |         |        |
| 24 | Yes                         | 738  | 430(59.1)  | 56.6 | 87.043  | <0.001 |
| 25 | No                          | 5095 | 2076(40.8) | 37.8 |         |        |
| 26 | <b>Slowness</b>             | 3306 |            |      |         |        |
| 27 | Yes                         | 688  | 367(53.3)  | 50.2 | 54.008  | <0.001 |
| 28 | No                          | 2618 | 991(37.9)  | 35.1 |         |        |
| 29 |                             |      |            |      |         |        |

Abbreviations: DIC, decline in intrinsic capacity; ADL, activities of daily living; IADL, instrumental activities of daily living; CHD, coronary heart disease; COPD, chronic obstructive pulmonary disease.

# BMJ Open

## Cross-sectional Study Examining the Status of Intrinsic Capacity Decline in Community-dwelling Older Adults in China: Prevalence, Associated Factors, and Implications for Clinical Care

|                                 |                                                                                                                                                                                                                  |
|---------------------------------|------------------------------------------------------------------------------------------------------------------------------------------------------------------------------------------------------------------|
| Journal:                        | <i>BMJ Open</i>                                                                                                                                                                                                  |
| Manuscript ID                   | bmjopen-2020-043062.R1                                                                                                                                                                                           |
| Article Type:                   | Original research                                                                                                                                                                                                |
| Date Submitted by the Author:   | 07-Dec-2020                                                                                                                                                                                                      |
| Complete List of Authors:       | Ma, Lina; Xuanwu Hospital, Department of Geriatrics<br>Chhetri, Jagadish K; Xuanwu Hospital<br>Zhang, Li; Xuanwu Hospital<br>Sun, Fei; Xuanwu Hospital<br>Li, Yun; Xuanwu Hospital<br>Tang, Zhe; Xuanwu Hospital |
| <b>Primary Subject Heading</b>: | Geriatric medicine                                                                                                                                                                                               |
| Secondary Subject Heading:      | Geriatric medicine                                                                                                                                                                                               |
| Keywords:                       | GERIATRIC MEDICINE, EPIDEMIOLOGY, GENERAL MEDICINE (see Internal Medicine)                                                                                                                                       |
|                                 |                                                                                                                                                                                                                  |

SCHOLARONE™  
Manuscripts





I, the Submitting Author has the right to grant and does grant on behalf of all authors of the Work (as defined in the below author licence), an exclusive licence and/or a non-exclusive licence for contributions from authors who are: i) UK Crown employees; ii) where BMJ has agreed a CC-BY licence shall apply, and/or iii) in accordance with the terms applicable for US Federal Government officers or employees acting as part of their official duties; on a worldwide, perpetual, irrevocable, royalty-free basis to BMJ Publishing Group Ltd ("BMJ") its licensees and where the relevant Journal is co-owned by BMJ to the co-owners of the Journal, to publish the Work in this journal and any other BMJ products and to exploit all rights, as set out in our [licence](#).

The Submitting Author accepts and understands that any supply made under these terms is made by BMJ to the Submitting Author unless you are acting as an employee on behalf of your employer or a postgraduate student of an affiliated institution which is paying any applicable article publishing charge ("APC") for Open Access articles. Where the Submitting Author wishes to make the Work available on an Open Access basis (and intends to pay the relevant APC), the terms of reuse of such Open Access shall be governed by a Creative Commons licence – details of these licences and which [Creative Commons](#) licence will apply to this Work are set out in our licence referred to above.

Other than as permitted in any relevant BMJ Author's Self Archiving Policies, I confirm this Work has not been accepted for publication elsewhere, is not being considered for publication elsewhere and does not duplicate material already published. I confirm all authors consent to publication of this Work and authorise the granting of this licence.

1  
2  
3 1 **Cross-sectional Study Examining the Status of Intrinsic Capacity Decline in Community-**  
4  
5 2 **dwelling Older Adults in China: Prevalence, Associated Factors, and Implications for**  
6  
7 3 **Clinical Care**  
8  
9

10  
11 4 Lina Ma<sup>1</sup>, Jagadish K. Chhetri<sup>1</sup>, Li Zhang<sup>1</sup>, Fei Sun<sup>2</sup>, Yun Li<sup>1</sup>, Zhe Tang<sup>1,2</sup>  
12  
13

14 5 <sup>1</sup> Department of Geriatrics, Xuanwu Hospital, Capital Medical University, China National Clinical  
15  
16 6 Research Center for Geriatric Disorders, Beijing 100053, China.  
17  
18

19 7 <sup>2</sup> Beijing Institute of Geriatrics, Xuanwu Hospital, Capital Medical University, Beijing 100053,  
20  
21 8 China  
22  
23

24  
25 9 **Correspondence:** Dr. Zhe Tang, Beijing Institute of Geriatrics, Xuanwu Hospital, Capital Medical  
26  
27 10 University, e-mail: tangzhe@sina.com; Dr. Lina Ma, Department of Geriatrics, Xuanwu Hospital,  
28  
29 11 Capital Medical University, e-mail: [malina0883@126.com](mailto:malina0883@126.com).  
30  
31

32  
33 12  
34  
35  
36 13 Running title: Status of Intrinsic Capacity Decline in China  
37  
38

39 14 Main text word count: 3324  
40  
41

42 15 Data elements: 3 Tables, 2 Figures, 3 Supplementary Tables  
43  
44  
45  
46  
47  
48  
49  
50  
51  
52  
53  
54  
55  
56  
57  
58  
59  
60

1  
2  
3 **17 Abstract**  
4  
5

6 **18 Objectives:** Intrinsic capacity (IC) was proposed by the World Health Organization as a new  
7  
8  
9 **19** concept for capturing an individual's functional capacities across their lifetime. We aimed to  
10  
11 **20** investigate the prevalence and factors associated with IC decline and examine associations  
12  
13 **21** between IC and adverse outcomes among community-dwelling older adults in China.  
14  
15

16 **22 Design:** Cross-sectional study.  
17  
18

19 **23 Setting:** Community, China.  
20  
21

22 **24 Participants:** Data were derived from the China Comprehensive Geriatric Assessment Study, a  
23  
24  
25  
26  
27  
28  
29  
30  
31  
32  
33  
34  
35  
36  
37  
38  
39  
40  
41  
42  
43  
44  
45  
46  
47  
48  
49  
50  
51  
52  
53  
54  
55  
56  
57  
58  
59  
60  
**25** population-based nationally representative sample. IC comprises of five domains: locomotion,  
**26** cognition, vitality, sensory, and psychology. Participants were deemed to have IC decline if they  
**27** showed a decline in any of the five domains. Sociodemographic characteristics, chronic diseases,  
**28** geriatric syndromes, and adverse outcomes were also examined.

**29 Results:** Of the 5,823 community-dwelling participants aged 60–98 years, 2,506 had IC decline  
**30** (weighted 39.9%): 57.7% in Western, 38.3% in Northern, 33.7% in Northwest, 36.1% in Middle,  
**31** 16.9% in Eastern, and 19.8% in Northeast China. The number of participants with decline in the  
**32** locomotion, cognition, vitality, sensory, and psychological domains were 1,039 (17.8%), 646  
**33** (11.1%), 735 (12.6%), 824 (14.2%), and 713 (12.2%), respectively. Age, northern residence, low  
**34** education, being unmarried, low income, less exercise, less meat intake, insomnia, memory loss,  
**35** urinary incontinence, constipation, slowness, chronic obstructive pulmonary disease, and  
**36** osteoarthritis were related to IC decline. After adjusting for age, sex, area, district, marriage,  
**37** education, waist-hip ratio, smoking, alcohol consumption, exercise, income, and chronic diseases,

1  
2  
3 38 IC decline was independently associated with risk of frailty, disability, falls, fractures, and  
4  
5 39 immobility.  
6  
7

8  
9 40 **Conclusion:** The prevalence of IC decline in China is high. IC decline was significantly associated  
10  
11 41 with adverse outcomes, after adjustment for related variables. Efforts promoting IC to delay  
12  
13 42 functional dependence should focus on modifiable factors, including negative social factors, poor  
14  
15 43 lifestyle, chronic diseases, and geriatric syndromes.  
16  
17

18  
19 44

20  
21  
22 45 **Keywords:** Intrinsic capacity; Older Adults; Prevalence; Frailty; Disability; Aging  
23  
24

25 46  
26  
27  
28  
29  
30  
31  
32  
33  
34  
35  
36  
37  
38  
39  
40  
41  
42  
43  
44  
45  
46  
47  
48  
49  
50  
51  
52  
53  
54  
55  
56  
57  
58  
59  
60

1  
2  
3 47 **Article summary**  
4  
5

6 48 **Strengths and limitations of this study**  
7  
8

- 9 49 ● This study is the first nationally representative large sample of population-based older people  
10 focusing on intrinsic capacity (IC) in China.  
11  
12 50  
13  
14 51 ● Most of the domains of IC were assessed using unified measured performance tests.  
15  
16  
17 52 ● This study provided a preliminary understanding of the IC status in China, which suggests  
18 ways to successfully put IC into clinical practice contributing to the development of integrated  
19 53 care strategies for older persons with IC decline.  
20  
21 54  
22  
23 55 ● The cross-sectional design of this study limits causality.  
24  
25  
26 56 ● We used a composite total score instead of a weighted score, so further statistical approaches  
27 should be conducted to compute the IC score.  
28  
29 57  
30  
31  
32  
33  
34  
35  
36  
37  
38  
39  
40  
41  
42  
43  
44  
45  
46  
47  
48  
49  
50  
51  
52  
53  
54  
55  
56  
57  
58

## 59 Introduction

60 The increasing global burden of disability associated with the rapid aging of the population has  
61 challenged the health care system <sup>1</sup>. To cope with the demands of increasing numbers of frail  
62 community-dwelling older persons with multiple complex needs, the implementation of integrated  
63 care healthcare model is necessary <sup>2</sup>. The World Health Organization (WHO) has proposed an  
64 innovative approach known as the Integrated Care for Older People (ICOPE). This approach  
65 centers around the concept of raising intrinsic capacity (IC) and functional ability to achieve  
66 healthy aging. Recommendations for the development of comprehensive approaches for the  
67 maintenance of IC and functional ability, including quality integrated care, have also been made.  
68 Moreover, the importance of integrated care in improving quality of life in the older population  
69 has been recently highlighted <sup>3,4</sup>, including reducing frailty in community-dwelling older people <sup>5</sup>.

70 According to the WHO ICOPE guidelines, IC comprises an individual's physical and mental  
71 capacities at any given time <sup>4</sup>. This novel concept of IC has shifted the notion of "healthy aging"  
72 from a disease-centered to a function-centered paradigm, creating opportunities for earlier  
73 intervention to delay disability and care-dependency. The WHO proposes five components for the  
74 assessment of IC, namely locomotion, cognition, vitality, sensory, and psychology <sup>3,4</sup>. Since each  
75 component is associated with adverse health events in older people recent studies have focused on  
76 these components in combination <sup>6-16</sup>. As so, our in-depth understanding of the trajectory of IC  
77 decline may enable us to design innovative methods for the promotion of healthy aging <sup>17</sup>, even  
78 during a catastrophic event such as the coronavirus disease <sup>18</sup>. Although the concept of IC has been  
79 used in several studies worldwide <sup>12,15,16</sup>, no studies have been conducted in China. Therefore, to  
80 facilitate the evaluation of integrated care approaches for older patients, this study focuses on (1)

1  
2  
3 81 the prevalence of IC and the factors associated with IC decline and (2) the associations between  
4  
5 82 IC and geriatric conditions such as frailty, disability, falls, fractures, and immobility in a  
6  
7  
8 83 population-based nationally representative sample of community-dwelling older people in China.  
9  
10

11 84

## 14 85 **Methods**

### 17 86 *Participants*

20 87 Data were obtained from the China Comprehensive Geriatric Assessment Study (CCGAS, 2011–  
21  
22 88 2012), a population-based face-to-face survey of adults aged 60 years or over from rural and urban  
23  
24  
25 89 areas of China. Further details regarding the CCGAS have been reported <sup>19–21</sup>. For the CCGAS,  
26  
27 90 seven cities (Beijing, Xi'an, Harbin, Chengdu, Chongqing, Changsha, and Shanghai) from seven  
28  
29  
30 91 different provinces were chosen based on well-established cluster, stratification, and random  
31  
32 92 selection statistical sampling techniques. These cities represent China's six main regions (northern,  
33  
34 93 middle, eastern, northwestern, southwestern, and northeastern). A total of 6,867 older adults were  
35  
36 94 included in the CCGAS. A total of 5,823 participants with complete IC data were included in our  
37  
38  
39 95 current study and 1,040 were excluded because of missing data. A comparison of included and  
40  
41 96 excluded participants' characteristics is shown in supplementary table S1. All participants  
42  
43 97 provided informed consent and the study design was approved by the ethics review board of  
44  
45  
46 98 Xuanwu Hospital Capital Medical University.

47  
48  
49 99

### 52 100 *Demographics, lifestyles, and diseases*

55 101 Data included sociodemographic characteristics, anthropometric measurements, health status,

56  
57  
58  
59  
60 6

1  
2  
3 102 personal habits, and mental health. Medical conditions including a self-reported history of chronic  
4  
5 103 disease diagnosed by a doctor and geriatric syndromes were recorded. Low income was defined  
6  
7  
8 104 as monthly income < 2,000 Yuan, no exercise was defined as exercising for < 3 hours per week,  
9  
10 105 and meat intake was measured by asking participants if they had meat diet  $\geq 2$  times per week.  
11  
12

13 106

14  
15  
16 107 *IC construct*

17  
18  
19 108 IC was assessed using the five components recommended by the WHO <sup>3,22</sup> as described below:  
20  
21

22 109 1)Locomotion: It was assessed by a short physical performance battery (SPPB) which comprised  
23  
24  
25 110 of various tests <sup>23</sup>. The balance test comprised three parts: standing unsupported for 10 seconds  
26  
27 111 with feet together; a semi-tandem stand; and a full-tandem stand. Participants who were unable to  
28  
29 112 complete each part received a score of 1; otherwise, they were scored 0. The chair-stand test was  
30  
31 113 performed with the participant seated in a chair, with feet flat on the floor and arms held flat against  
32  
33 114 their sides with elbows at 90°. Participants who were able to stand up five times from the chair  
34  
35 115 received a score of 1, those who partially completed this task scored 0.5, and those who could not  
36  
37  
38 116 stand up at all scored 0. A 20-meter walking test was also conducted: those who were able to walk  
39  
40 117 20 meters scored 1, those who walked less than 20 meters scored 0.5, and those could not walk at  
41  
42  
43 118 all scored 0. The total score range for the SPPB was 0–5.

44  
45  
46 119 2) Cognition: It was assessed by the Mini-Mental State Examination (MMSE), with a total score  
47  
48  
49 120 range of 0–30 <sup>24</sup>. The thresholds for participants who were illiterate or who were educated up to  
50  
51 121 elementary school, middle school, and high school or above were 17, 20, and 24, respectively.  
52  
53 122 Participants who scored below the threshold value for their education group were regarded as  
54  
55



1  
2  
3 123 mildly cognitively impaired (score of 1), and those who scored below 15 were regarded as  
4  
5 124 moderately to severely cognitively impaired (score of 0).  
6  
7

8  
9 125 3) Vitality: It was assessed by body mass index (BMI), which was calculated by dividing weight  
10  
11 126 in kilograms by height in meters squared. BMI cutoffs were based on the Malnutrition Universal  
12  
13 127 Screening Tool (MUST)<sup>25</sup>. A BMI above 20kg/m<sup>2</sup> received a score of 2, 18.5–20 kg/m<sup>2</sup> was scored  
14  
15 128 1, and  $\leq 18.5$  kg/m<sup>2</sup> was scored 0.  
16  
17

18  
19 129 4) Sensory: It was assessed by a self-reported visual and hearing impairment. Vision capacity was  
20  
21 130 considered intact when the participant did not report “eyesight problems” that interfered with their  
22  
23 131 activities and were not identified by the interviewer as being functionally blind. Hearing capacity  
24  
25 132 was considered intact when the participant did not report “hearing problems or deafness” that  
26  
27 133 interfered with their activities, and was not identified by the interviewer as being profoundly deaf.  
28  
29 134 Participants with both visual and hearing impairments received a score of 0, those with either  
30  
31 135 vision or hearing impairment received a score of 1, and those with intact vision and hearing  
32  
33 136 capacities scored 2.  
34  
35  
36  
37

38 137 5) Psychology: It was measured by the 30-item Geriatric Depression Scale (GDS-30) with a total  
39  
40 138 score range of 0–30<sup>26</sup>. Scores from 0 to 10 represent an intact psychological (score of 2), scores  
41  
42 139 from 11 to 20 represent mild depression (score of 1), and scores from 21 to 30 represent moderate  
43  
44 140 to severe depression (score of 0).  
45  
46  
47

48 141 For each of the five components, participants were scored either 0 (representing severe decline), 1  
49  
50 142 (representing mild decline), or 2 (representing intact IC). The total score of IC ranged from 0–10;  
51  
52 143 higher scores indicated better performance.  
53  
54  
55  
56  
57  
58  
59  
60

1  
2  
3 144  
4  
56 145 *Adverse outcomes*  
7  
8

9 146 Physical function was assessed as activities of daily living (ADL) and instrumental activities of  
10  
11 147 daily living (IADL). The list of activities consisted of 14 items (eating, grooming, dressing,  
12  
13 148 transferring in and out of bed, bathing, walking inside the house, using the toilet, cooking,  
14  
15 149 managing finances, driving or using public transportation, shopping, walking 250 meters, cutting  
16  
17 150 toenails, and climbing stairs) and a participant's performance for each item was classified as  
18  
19 151 independent, partially dependent, or completely dependent. Those with one or more impaired ADL  
20  
21 152 or IADL functions were defined as disabled. Frailty was assessed using a frailty index, derived  
22  
23 153 from the standard Comprehensive Geriatric Assessment (CGA) instrument (FI was primarily based  
24  
25 154 on six domains: demographic characteristics, physical health, physical functions, living behavior  
26  
27 155 and social functions, mental health, and cognitive functions)<sup>27</sup>. Frailty was defined by a score of  
28  
29 156  $\geq 0.25$ <sup>28</sup>. Fractures were defined as a self-reported history of spontaneous fractures occurring in  
30  
31 157 the past two years and falls were defined as those that occurred twice in the past year. Immobility  
32  
33 158 was self-reported.  
34  
35  
36  
37  
38  
39

40 159  
41  
4243 160 *Bias*  
44  
45

46 161 A door-to-door survey was conducted by formally trained interviewers using the CGA to ensure  
47  
48 162 homogeneous reporting. Quality control procedures included regular field supervision and daily  
49  
50 163 review of collected data. EpiData was used to establish the database and input and automatically  
51  
52 164 verify the data.  
53  
54  
55

165

*Study size*

The sample size was estimated to measure the prevalence of IC decline in older adults. Assuming an IC decline prevalence of approximately 30% with a precision margin of 2%, the estimated sample size was 2,016. Assuming a 15% refusal or absence, we estimated a sample size adjusted to 2,372.

171

*Statistical methods*

All statistical analyses were performed using SPSS (Chicago, IL, USA, version 11.0). Count data were expressed as percentages. Chi-square tests, t-tests, and one-way analysis of variance were performed. Those with a P-value less than 0.05 were included in the multivariable model. The weighted percentages were determined using the national standard population composition ratio based on the Sixth National Census (2010). A forward stepwise logistic regression was conducted to explore the association between the included factors and IC decline or between IC decline and adverse outcomes. A P-value of  $< 0.05$  was considered statistically significant.

180

*Patient and public involvement*

Patients and the public were not involved in the planning and design of this study.

183

**Results**

10

1  
2  
3 185 Of the total 5,823 older adults, the average IC score was  $9.14 \pm 1.304$ , the median (IQR) score was  
4  
5 186 10(1), and 2,506 had IC decline, yielding a prevalence of 43.0% (weighted 39.9%). A total of  
6  
7 187 3,317 (57.0%), 1,512 (26.0%), 636 (10.9%), 271 (4.7%), 75(1.3%), and 12 (0.2%) participants  
8  
9 188 showed decline in 0, 1, 2, 3, 4, and 5 domains, respectively. The prevalence of IC decline was  
10  
11 189 higher in women than in men (43.0% vs. 36.7%,  $P = 0.004$ ). The prevalence of IC decline among  
12  
13 190 older adults in rural areas was higher, by 1.36 times than in urban areas ( $P < 0.001$ ). The prevalence  
14  
15 191 of IC decline increased with age, with the highest decline observed in individuals aged  $\geq 80$  years  
16  
17 192 (66.6%) and the lowest in those aged 60–64 years (28.6%;  $P < 0.001$ ; Table 1). The number of  
18  
19 193 participants with decline in the locomotion, cognition, vitality, sensory, and psychological domains  
20  
21 194 was 1,039 (17.8%), 646 (11.1%), 735 (12.6%), 824 (14.2%), and 713 (12.2%), respectively. For  
22  
23 195 each domain, the prevalence was higher in females and those in rural areas, and increased with  
24  
25 196 age, although there was no association between psychological domain and age (Table S2).

26  
27  
28  
29  
30  
31 197 We observed differences in the prevalence of IC decline among the six regions: 57.7% in Western  
32  
33 198 China, 38.3% in Northern China, 33.7% in Northwest China, 36.1% in Middle China, 16.9% in  
34  
35 199 Eastern China, and 19.8% in Northeast China (Figure 1A). The prevalence of IC decline was higher  
36  
37 200 in northern than southern regions (46.9% vs. 36.7%,  $P < 0.001$ ; Figure 1B). The IC score decreased  
38  
39 201 in older age groups ( $9.53 \pm 0.88$  for the 60–64 years age group,  $49.37 \pm 1.06$  for the 65–69 years age  
40  
41 202 group,  $9.18 \pm 1.22$  for the 70–74 years age group,  $8.96 \pm 1.39$  for the 75–79 years age group,  
42  
43 203  $8.35 \pm 1.73$  for the 80 years and over age group ( $P < 0.001$ ; Figure 1C) and was higher in men than  
44  
45 204 in women ( $9.24 \pm 1.19$  vs.  $9.06 \pm 1.38$ ,  $P < 0.001$ ; Figure 1D).

46  
47  
48  
49  
50  
51 205 Next, we observed the prevalence of IC decline in different regions according to geography, sex,  
52  
53 206 and age. In urban areas, the weighted prevalence of IC decline differed across the six regions, with

1  
2  
3 207 western urban regions showing the highest rates and eastern urban regions showing the lowest  
4  
5 208 rates: 43.1% in Western China, 36.1% in Middle China, 33.7% in Northwest China, 30.7% in  
6  
7  
8 209 Northern China, 19.8% in Northeast China, and 11.8% in Eastern China. Older adults living in  
9  
10 210 rural areas included those residing in Beijing and Chengdu, and the prevalence of IC decline was  
11  
12 211 higher in Chengdu than in Beijing (74.1% vs. 47.2%,  $P < 0.001$ ). The prevalence of IC decline  
13  
14 212 among the six regions was different when analyzed according to sex and age, with western regions  
15  
16 213 showing the highest rate in both genders, in those aged  $< 75$  years, and those aged  $\geq 75$  years; the  
17  
18 214 eastern regions showing the lowest rates in both genders and those aged  $< 75$  years; and east-north  
19  
20 215 regions showing the lowest rates in those aged  $\geq 75$  years ( $P < 0.001$ ; Figure 2).  
21  
22  
23

24  
25 216 When comparing socio-psychological factors, chronic diseases, and geriatric syndromes, a high  
26  
27 217 prevalence of IC decline was observed in illiterate participants ( $P < 0.001$ ), those with low income  
28  
29 218 ( $P < 0.001$ ), who were unmarried ( $P < 0.001$ ), did not exercise ( $P < 0.001$ ), consumed less meat  
30  
31 219 diet ( $P < 0.001$ ), and consumed alcohol ( $P = 0.043$ ). Those with chronic diseases such as coronary  
32  
33 220 heart disease ( $P < 0.001$ ), stroke ( $P < 0.001$ ), kidney disease ( $P = 0.002$ ), chronic obstructive  
34  
35 221 pulmonary disease ( $P < 0.001$ ), and osteoarthritis ( $P < 0.001$ ), as well as geriatric syndromes ( $P <$   
36  
37 222  $0.001$ ) had a higher prevalence of IC decline, while there was a lower prevalence in older adults  
38  
39 223 without diabetes ( $P = 0.044$ ; Table S3). The prevalence of IC decline among individuals with  $\geq 5$   
40  
41 224 chronic diseases was approximately two times higher than among individuals without chronic  
42  
43 225 disease (62.5% vs. 30.9%,  $P < 0.001$ ).  
44  
45  
46  
47

48  
49 226 With IC decline as the dependent variable and the above factors as independent variables, forward  
50  
51 227 logistic analysis showed that older age ( $P < 0.001$ ), northern region ( $P < 0.001$ ), low education ( $P$   
52  
53 228  $< 0.001$ ), being unmarried ( $P < 0.001$ ), low income ( $P < 0.001$ ), less exercise ( $P = 0.003$ ), less meat  
54  
55  
56  
57

1  
2  
3 229 intake ( $P = 0.003$ ), insomnia ( $P < 0.001$ ), memory decline ( $P < 0.001$ ), urinary incontinence ( $P =$   
4  
5 230  $0.001$ ), constipation ( $P = 0.001$ ), slowness ( $P < 0.001$ ), chronic obstructive pulmonary disease ( $P$   
6  
7 231  $< 0.001$ ), and osteoarthritis ( $P < 0.001$ ) were independently associated with IC decline in older  
8  
9  
10 232 adults (Table 2).

11  
12  
13 233 We further compared the frequency of adverse clinical outcomes between non-IC decline and IC  
14  
15 234 decline groups. Participants with IC decline were much more likely to be frail (22.2% vs. 1.2%,  $P$   
16  
17 235  $< 0.001$ ), disabled (15.0% vs. 1.0%,  $P < 0.001$ ), and have falls (7.9% vs. 1.8%,  $P < 0.001$ ), fractures  
18  
19 236 (4.7% vs. 2.2%,  $P < 0.001$ ), and be immobile (20.4% vs. 3.4%,  $P < 0.001$ ). Logistic regression  
20  
21 237 showed that, after adjustment for age, sex, area, district, marriage, education, waist-hip ratio,  
22  
23 238 smoking, alcohol consumption, exercise, income, and chronic diseases, IC decline was  
24  
25 239 independently associated with risks of frailty (adjusted OR = 19.021,  $P < 0.001$ ), disability  
26  
27 240 (adjusted OR = 8.611,  $P < 0.001$ ), falls (adjusted OR = 3.053,  $P < 0.001$ ), fractures (adjusted OR  
28  
29 241 = 1.656,  $P = 0.003$ ), and immobility (adjusted OR = 4.403,  $P < 0.001$ ; Table 3).  
30  
31  
32  
33  
34  
35 242

## 36 37 38 243 **Discussion**

39  
40  
41 244 In this nationally representative population based cross-sectional study, the weighted prevalence  
42  
43 245 of IC decline was as high as 39.9% in community-living Chinese older adults aged  $\geq 60$  years,  
44  
45 246 which is approximately five times higher than the prevalence of frailty in the same population<sup>29</sup>.  
46  
47 247 The frequency of participants with a decline in IC domains varied from 11.1% (cognition) to 17.8%  
48  
49 248 (locomotion). These findings highlight the need to focus on functional trajectories rather than the  
50  
51 249 traditional disease-centered approach. However, well-established concepts such as frailty (which  
52  
53 250 is related as an increasingly problematic consequence of population aging), threaten the  
54  
55  
56  
57  
58  
59  
60

1  
2  
3 251 sustainability of healthcare resources as most people seek healthcare attention only when they are  
4  
5 252 at their worst health state. Furthermore, studies have reported that current integrated care models  
6  
7  
8 253 have not significantly reduced healthcare utilization nor consistently reduced mortality<sup>30</sup>. Thus,  
9  
10 254 healthcare model such as ICOPE with IC as its core of may support the modernization of current  
11  
12 255 healthcare systems and at the same time be more personalized. Results of ongoing ambitious  
13  
14 256 INSPIRE study conducted in Europe which is based on the ICOPE model<sup>31</sup> will have strong  
15  
16  
17 257 implications for the effectiveness of the IC approach.  
18  
19

20 258 Our study demonstrated that the prevalence of IC decline among participants was higher in  
21  
22 259 northern than southern regions of China. Furthermore, there were differences in the prevalence of  
23  
24 260 IC decline among the six regions, which was consistent with previous studies in which the  
25  
26  
27 261 incidence of frailty<sup>32</sup> and prevalence of disability<sup>20</sup> was more common in the north than the south,  
28  
29 262 indicating the importance of implementing the ICOPE protocol, especially in northern China. We  
30  
31 263 found that the IC score decreased in older age groups, while longitudinal studies showed that the  
32  
33  
34 264 effect of age on the incidence of ADL dependency was modified by IC<sup>15</sup>.  
35  
36

37 265 Logistic regression showed that factors such as age, region, low education, unmarried status, low  
38  
39 266 income, less exercise, less meat intake, insomnia, memory loss, urinary incontinence, constipation,  
40  
41 267 slowness, chronic obstructive pulmonary disease, and osteoarthritis were independently associated  
42  
43  
44 268 with IC decline in older adults, demonstrating that efforts to develop strategies and health policies  
45  
46 269 to identify and manage modifiable variables are urgently required. A longitudinal study in New  
47  
48 270 Zealand showed that neighborhood environments and IC interact to affect the quality of life in  
49  
50 271 older persons<sup>33</sup>. Since the above factors are independently associated with an individual's IC,  
51  
52  
53 272 multidomain and complex interventions provide a better option for the prevention and  
54  
55  
56  
57  
58  
59  
60

1  
2  
3 273 management of IC decline. Accordingly, the WHO recommends screening using instruments such  
4  
5 274 as the ICOPE screening tool as the first step at the primary care level followed by a suitable care  
6  
7  
8 275 plan<sup>3,4,34</sup>.

9  
10  
11 276 We demonstrated that after adjusting for sociodemographic variables, age-related factors, and  
12  
13 277 chronic conditions, IC decline was independently associated with risk of frailty, disability, falls,  
14  
15 278 fractures, and immobility, which is in line with the finding that IC predicted the incidence of loss  
16  
17 279 of ADLs and IADLs <sup>15</sup>, and further indicates that evaluations of IC implementation may be  
18  
19 280 extremely important to avoid further deterioration (which could be a severe frailty state). The term  
20  
21 281 frailty refers to health deficits of an aging individual while IC emphasizes on positive health  
22  
23 282 aspects, therefore, IC may be considered as an evolution of frailty in certain respects <sup>35</sup>. It is also  
24  
25 283 noteworthy that the World Report on Ageing and Health proposes the concept of IC as central for  
26  
27 284 healthy aging <sup>4</sup>, thus, the concept of IC could serve as a bridge between geroscience and healthy  
28  
29 285 aging <sup>14</sup>. Furthermore, an IC approach has the benefit of tracing trajectories for progression to  
30  
31 286 adverse clinical outcomes such as frailty and disability, and testing the effectiveness of  
32  
33 287 interventions implemented at the individual level. Thus, an IC model is of great significance for  
34  
35 288 facing the unmet needs of older adults.

36  
37  
38  
39  
40  
41 289 This study has several limitations. First, the primary limitation is being unable to establish  
42  
43 290 causality due to the cross-sectional design. Further longitudinal studies with a larger sample size  
44  
45 291 are urgently required. Second, vitality was defined by BMI instead of specific nutritional  
46  
47 292 assessment, which may have affected some of the results. Since most of the diabetic patients in  
48  
49 293 our study had a higher BMI, this could explain the lower IC decline in participants with diabetes.  
50  
51 294 Third, we used a composite total score instead of a weighted score, so further statistical approaches  
52  
53  
54  
55  
56  
57  
58  
59  
60



1  
2  
3 295 should be conducted to compute IC scores. Fourth, self-reporting for hearing impairment may  
4  
5 296 misestimate hearing loss (although WHO recommends whisper test for assessing hearing loss).  
6  
7  
8 297 Fifth, 1,040 participants who were unable to complete the IC assessment were excluded in this  
9  
10 298 study. The excluded participants who were older and frailer, had more chronic diseases, and lower  
11  
12 299 scores in each domain (Table S1), which may have misestimated the prevalence of IC decline.  
13  
14

15 300 To the best of our knowledge, this study is the first nationally representative large sample of  
16  
17 301 population-based older people focusing on IC in China. Most of the components of IC were  
18  
19 302 assessed using unified measured performance tests, thus avoiding response or interviewer bias.  
20  
21 303 Standardized protocols, as well as regularly and randomly performed internal quality checks of the  
22  
23 304 data, were used to avoid the quality disadvantage of the multi-center design.  
24  
25  
26  
27

28 305 In conclusion, this study provided a preliminary understanding of the IC status of Chinese older  
29  
30 306 adults. Our results indicate that efforts promoting IC to delay functional dependence should focus  
31  
32 307 on negative social factors, poor lifestyle, chronic diseases, and geriatric syndromes. This study  
33  
34 308 also validated the IC concept in Chinese population. In fact, China has already implemented the  
35  
36 309 ICOPE approach into clinical practice and launched a pilot multi-center study called “China Aging,  
37  
38 310 Resilience and Intrinsic Capacity Study (CARICS)” to identify and manage IC decline to improve  
39  
40 311 well-being among community-living older adults. We hope that this approach of IC will be a  
41  
42 312 fundamental tool towards healthy ageing worldwide.  
43  
44  
45  
46

47 313  
48  
49  
50  
51  
52  
53  
54  
55  
56  
57  
58  
59  
60

1  
2  
3 314 **Funding:** This work was supported by the following grants: National Key R&D Program of China  
4  
5 315 (2020YFC2008604, 2018YFC1312001), the National Natural Science Foundation of Beijing  
6  
7 316 (7202059), Beijing Municipal Hospital Scientific Research Training Project (PX2020036), Beijing  
8  
9  
10 317 Municipal Health Commission (Jing2019-2), and Milstein Medical Asian American Partnership  
11  
12 318 Foundation Project Award in Geriatrics.

13  
14  
15 319 **Acknowledgments:** We acknowledge all the people who participated in the CCGAS from the  
16  
17 320 following hospitals: Xuanwu Hospital, Beijing Hospital, Beijing Institute of Geriatrics, General  
18  
19 321 Hospital of PLA, Peking University Third Hospital, The First Affiliated Hospital of Xi'an Jiaotong  
20  
21 322 University, Xijing Hospital of The Fourth Military Medical University, The First Affiliated  
22  
23 323 Hospital of Harbin Medical University, West China Hospital of Sichuan University, First  
24  
25 324 Affiliated Hospital of Chongqing Medical University, Xiangya Hospital of Central South  
26  
27 325 University, The Third Xiangya Hospital of Central South University, and Ruijin Hospital of  
28  
29 326 Shanghai Jiao Tong University School of Medicine.

30  
31  
32  
33  
34 327 **Author contributions:** LM and ZT conceived of the research, reviewed related literature, oversaw  
35  
36 328 analysis and was responsible for the final drafting of the paper. JC, FS, LZ and YL contributed to  
37  
38 329 conceptualisation, reviews of related literature and drafting of the paper. All authors reviewed and  
39  
40 330 approved the final manuscript submitted for publication.

41  
42  
43  
44 331 **Data sharing statement:** No additional data are available.

45  
46  
47 332 **Conflict of interest:** None declared.

48  
49  
50 333 **Patient consent for publication:** Not required.

51  
52  
53  
54 334 **Ethical approval:** All study participants provided informed consent, and the study design was

1  
2  
3  
4  
5  
6  
7  
8  
9  
10  
11  
12  
13  
14  
15  
16  
17  
18  
19  
20  
21  
22  
23  
24  
25  
26  
27  
28  
29  
30  
31  
32  
33  
34  
35  
36  
37  
38  
39  
40  
41  
42  
43  
44  
45  
46  
47  
48  
49  
50  
51  
52  
53  
54  
55  
56  
57  
58  
59  
60

335 approved by the ethics review board of Xuanwu Hospital Capital Medical University.

336

For peer review only

337 **References**

- 338 1. Prince MJ, Wu F, Guo Y, et al. The burden of disease in older people and implications for  
339 health policy and practice. *Lancet*. 2015;385(9967):549–62.
- 340 2. Stoop A, Lette M, Ambugo EA, et al. Improving Person-Centredness in Integrated Care  
341 for Older People: Experiences from Thirteen Integrated Care Sites in Europe. *Int J Integr*  
342 *Care* [Internet] 2020 [cited 2020 Jul 3];20(2):16. Available from:  
343 <https://www.ijic.org/article/10.5334/ijic.5427/>
- 344 3. Integrated Care for Older People: Guidelines on Community-Level Interventions to  
345 Manage Declines in Intrinsic Capacity [Internet]. 2017 [cited 2020 Jul 3]; Available from:  
346 <https://pubmed.ncbi.nlm.nih.gov/29608259/>
- 347 4. World Health Organization. Ageing and health [Internet]. 2018 [cited 2018 Jun  
348 23]; Available from: <http://www.who.int/news-room/fact-sheets/detail/ageing-and-health>
- 349 5. Ruby Yu, Cecilia Tong JW. Effect of an integrated care model for pre-frail and frail older  
350 people living in community. *Age Ageing* [Internet] 2020 [cited 2020 Jul 3]; Available  
351 from: [https://academic.oup.com/ageing/article-](https://academic.oup.com/ageing/article-abstract/doi/10.1093/ageing/afaa087/5848668?redirectedFrom=fulltext)  
352 [abstract/doi/10.1093/ageing/afaa087/5848668?redirectedFrom=fulltext](https://academic.oup.com/ageing/article-abstract/doi/10.1093/ageing/afaa087/5848668?redirectedFrom=fulltext)
- 353 6. Framework Implementation of the INSPIRE ICOPE-CARE Program in Collaboration  
354 with the World Health Organization (WHO) in the Occitania Region. *J Frailty Aging*  
355 2020;1–7.
- 356 7. Alexia Charles, Fanny Buckinx, Médéa Locquet, Jean-Yves Reginster, Jean Petermans,  
357 Bastien Gruslin OB. Prediction of Adverse Outcomes in Nursing Home Residents

- 1  
2  
3 358 According to Intrinsic Capacity Proposed by the World Health Organization | The  
4  
5 359 Journals of Gerontology: Series A | Oxford Academic. J Gerontol A Biol Sci Med Sci  
6  
7 [Internet] 2019 [cited 2020 Jun 15];Available from:  
8 360  
9  
10 361 [https://academic.oup.com/biomedgerontology/advance-article-](https://academic.oup.com/biomedgerontology/advance-article-abstract/doi/10.1093/gerona/glz218/5575908?redirectedFrom=fulltext)  
11  
12 362 [abstract/doi/10.1093/gerona/glz218/5575908?redirectedFrom=fulltext](https://academic.oup.com/biomedgerontology/advance-article-abstract/doi/10.1093/gerona/glz218/5575908?redirectedFrom=fulltext)  
13  
14  
15 363 8. Giudici KV, de Souto Barreto P, Guerville F, et al. Associations of C-reactive protein and  
16  
17 homocysteine concentrations with the impairment of intrinsic capacity domains over a 5-  
18 364  
19 year follow-up among community-dwelling older adults at risk of cognitive decline  
20 365  
21 (MAPT Study). *Exp Gerontol* 2019;127.  
22 366  
23  
24  
25 367 9. Daskalopoulou C, Chua KC, Koukounari A, Caballero FF, Prince M, Prina AM.  
26  
27 Development of a healthy ageing index in Latin American countries - A 10/66 dementia  
28 368  
29 research group population-based study. *BMC Med Res Methodol* [Internet] 2019 [cited  
30 369  
31 2020 Nov 30];19(1):226. Available from:  
32 370  
33 <https://bmcmedresmethodol.biomedcentral.com/articles/10.1186/s12874-019-0849-y>  
34 371  
35  
36  
37  
38 372 10. Giudici K V., de Souto Barreto P, Beard J, et al. Effect of long-term omega-3  
39  
40 373 supplementation and a lifestyle multidomain intervention on intrinsic capacity among  
41  
42 374 community-dwelling older adults: Secondary analysis of a randomized, placebo-controlled  
43  
44 trial (MAPT study). *Maturitas* [Internet] 2020 [cited 2020 Nov 30];141:39–45. Available  
45 375  
46 from: <https://pubmed.ncbi.nlm.nih.gov/33036701/>  
47 376  
48  
49  
50 377 11. Huang CH, Umegaki H, Makino T, et al. Effect of Various Exercises on Intrinsic Capacity  
51  
52 378 in Older Adults With Subjective Cognitive Concerns. *J Am Med Dir Assoc* [Internet]  
53  
54 2020 [cited 2020 Nov 30];Available from: <https://pubmed.ncbi.nlm.nih.gov/32768376/>  
55 379  
56  
57  
58  
59  
60

- 1  
2  
3 380 12. Gutiérrez-Robledo LM, García-Chanes RE, Pérez-Zepeda MU. Allostatic Load as a  
4  
5 381 Biological Substrate to Intrinsic Capacity: A Secondary Analysis of CRELES. *J Nutr Heal*  
6  
7 382 *Aging* 2019;23(9):788–95.
- 8  
9  
10  
11 383 13. Ma L, Liu P, Zhang Y, Sha G, Zhang L, Li Y. High Serum Tumor Necrosis Factor  
12  
13 384 Receptor 1 Levels Are Related to Risk of Low Intrinsic Capacity in Elderly Adults. *J Nutr*  
14  
15 385 *Heal Aging* [Internet] 2020 [cited 2020 Nov 30];1–3. Available from:  
16  
17 386 <http://www.who.int/news-room/fact->
- 18  
19  
20  
21 387 14. Barreto P de S, Guyonnet S, Ader I, et al. The Inspire Research Initiative: A Program for  
22  
23 388 Geroscience and Healthy Aging Research going from Animal Models to Humans and the  
24  
25 389 Healthcare System. *J Frailty Aging* [Internet] 2020 [cited 2020 Jun 25];1–8. Available  
26  
27 390 from: <https://link.springer.com/article/10.14283/jfa.2020.18>
- 28  
29  
30  
31 391 15. Beard JR, Jotheeswaran AT, Cesari M, Araujo De Carvalho I. The structure and predictive  
32  
33 392 value of intrinsic capacity in a longitudinal study of ageing. *BMJ Open*  
34  
35 393 2019;9(11):e026119.
- 36  
37  
38  
39 394 16. Ramírez-Vélez R, Correa-Bautista JE, García-Hermoso A, Cano CA, Izquierdo M.  
40  
41 395 Reference values for handgrip strength and their association with intrinsic capacity  
42  
43 396 domains among older adults. *J Cachexia Sarcopenia Muscle* 2019;10(2):278–86.
- 44  
45  
46  
47 397 17. Cesari M, Araujo de Carvalho I, Amuthavalli Thiyagarajan J, et al. Evidence for the  
48  
49 398 Domains Supporting the Construct of Intrinsic Capacity. *Journals Gerontol Ser A*  
50  
51 399 [Internet] 2018 [cited 2018 Jun 22]; Available from:  
52  
53 400 <https://academic.oup.com/biomedgerontology/advance->

- 1  
2  
3 401 article/doi/10.1093/gerona/gly011/4834876  
4  
5  
6 402 18. Nestola T, Orlandini L, Beard JR, Cesari M. Covid-19 and Intrinsic Capacity. *J Nutr Heal*  
7  
8 403 Aging [Internet] 2020 [cited 2020 Jul 3];1–4. Available from:  
9  
10 404 <https://doi.org/10.15585/mmwr.mm6912e2>.  
11  
12  
13  
14 405 19. Ma L, Zhang L, Zhang Y, et al. Cognitive Frailty in China: Results from China  
15  
16 406 Comprehensive Geriatric Assessment Study. *Front Med* [Internet] 2017 [cited 2017 Oct  
17  
18 407 18];4:174. Available from:  
19  
20 408 <https://www.frontiersin.org/articles/10.3389/fmed.2017.00174/abstract>  
21  
22  
23  
24 409 20. Ma L, Li Z, Tang Z, et al. Prevalence and socio-demographic characteristics of disability  
25  
26 410 in older adults in China: Findings from China Comprehensive Geriatric Assessment  
27  
28 411 Study. *Arch Gerontol Geriatr* [Internet] 2017;73:199–203. Available from:  
29  
30 412 <http://linkinghub.elsevier.com/retrieve/pii/S0167494316302813>  
31  
32  
33  
34 413 21. Ma L, Tang Z, Zhang L, Sun F, Chan P. Prevalence of frailty and associated factors in the  
35  
36 414 community-dwelling population of China. *J Am Geriatr Soc*  
37  
38 415 2017;DOI:10.1111/jgs.15214.  
39  
40  
41  
42 416 22. WHO | Meeting of the Clinical Consortium on *Healthy Ageing*. WHO 2018;  
43  
44  
45 417 23. Guralnik JM, Simonsick EM, Ferrucci L, et al. A Short Physical Performance Battery  
46  
47 418 Assessing Lower Extremity Function: Association With Self-Reported Disability and  
48  
49 419 Prediction of Mortality and Nursing Home Admission. *J Gerontol* [Internet] 1994 [cited  
50  
51 420 2018 Aug 18];49(2):M85–94. Available from: [https://academic.oup.com/geronj/article-](https://academic.oup.com/geronj/article-lookup/doi/10.1093/geronj/49.2.M85)  
52  
53 421 [lookup/doi/10.1093/geronj/49.2.M85](https://academic.oup.com/geronj/article-lookup/doi/10.1093/geronj/49.2.M85)  
54  
55  
56  
57  
58  
59  
60

- 1  
2  
3 422 24. Li H, Jia J, Yang Z. Mini-Mental State Examination in Elderly Chinese: A Population-  
4  
5 423 Based Normative Study. *J Alzheimers Dis* [Internet] 2016 [cited 2018 Nov 16];53(2):487–  
6  
7 424 96. Available from:  
8  
9 425 <http://www.medra.org/servlet/aliasResolver?alias=iospress&doi=10.3233/JAD-160119>  
10  
11  
12  
13 426 25. M E. Screening for malnutrition: A multidisciplinary responsibility. *Development and Use*  
14  
15 427 of the Malnutrition Universal Screening Tool ('MUST') for Adults. Redditch: BAPEN  
16  
17 428 2003;  
18  
19  
20  
21 429 26. Chan ACM. Clinical validation of the Geriatric Depression Scale (GDS): Chinese version.  
22  
23 430 *J Aging Health* 1996;8(2):238–53.  
24  
25  
26 431 27. Ma L, Zhang L, Tang Z, et al. Use of the frailty index in evaluating the prognosis of older  
27  
28 432 people in Beijing: A cohort study with an 8-year follow-up. *Arch Gerontol Geriatr*  
29  
30 433 2016;64(3):172–7.  
31  
32  
33  
34 434 28. Rockwood K, Andrew M, Mitnitski A. A comparison of two approaches to measuring  
35  
36 435 frailty in elderly people. *J Gerontol A Biol Sci Med Sci* [Internet] 2007 [cited 2018 Apr  
37  
38 436 11];62(7):738–43. Available from: <http://www.ncbi.nlm.nih.gov/pubmed/17634321>  
39  
40  
41  
42 437 29. Ma L, Tang Z, Zhang L, Sun F, Li Y, Chan P. Prevalence of Frailty and Associated  
43  
44 438 Factors in the Community-Dwelling Population of China. *J Am Geriatr Soc* [Internet]  
45  
46 439 2018 [cited 2018 Apr 15];66(3):559–64. Available from:  
47  
48 440 <http://www.ncbi.nlm.nih.gov/pubmed/29168883>  
49  
50  
51  
52 441 30. Kasteridis P, Mason A, Street A. Evaluating integrated care for people with complex  
53  
54 442 needs. *J Health Serv Res Policy* [Internet] 2020 [cited 2020 Jul 3];135581962093187.  
55  
56  
57  
58  
59  
60



- 1  
2  
3 443 Available from: <http://journals.sagepub.com/doi/10.1177/1355819620931872>  
4  
5  
6 444 31. Takeda C, Guyonnet S, Sumi Y, Vellas B, Araujo de Carvalho I. Integrated Care for Older  
7  
8 445 People and the Implementation in the INSPIRE Care Cohort [Internet]. *J. Prev.*  
9  
10 446 *Alzheimer's Dis.* 2020 [cited 2020 Jul 3];7(2):70–4. Available from:  
11  
12  
13 447 <https://pubmed.ncbi.nlm.nih.gov/32236394/>  
14  
15  
16 448 32. Xu W, Li YX, Wu C. Incidence of frailty among community-dwelling older adults: A  
17  
18 449 nationally representative profile in China. *BMC Geriatr* 2019;19(1).  
19  
20  
21 450 33. Stephens C, Allen J, Keating N, Szabó Á, Alpass F. Neighborhood environments and  
22  
23 451 intrinsic capacity interact to affect the health-related quality of life of older people in New  
24  
25 452 Zealand. *Maturitas* 2020;139:1–5.  
26  
27  
28  
29 453 34. WHO | Integrated care for older people (ICOPE): guidance for person-centred assessment  
30  
31 454 and pathways in primary care. WHO [Internet] 2020 [cited 2020 Jul 3]; Available from:  
32  
33 455 <http://www.who.int/ageing/publications/icope-handbook/en/>  
34  
35  
36  
37 456 35. Belloni G, Cesari M. Frailty and Intrinsic Capacity: Two Distinct but Related Constructs.  
38  
39 457 *Front Med* 2019;  
40  
41  
42  
43 458  
44  
45  
46 459  
47  
48  
49  
50  
51  
52  
53  
54  
55  
56  
57  
58  
59  
60

## 460 Captions for Tables and Figures

461 Table 1. Prevalence of declines in intrinsic capacity in older adults by sex, area, and age

462 Table 2. Stepwise forward logistic regression for associated factors with intrinsic capacity decline

463 Table 3. Multivariate logistic regression analysis (forward method) for intrinsic capacity decline  
464 associated with risk of adverse clinical outcomes

465 Figure 1. Intrinsic capacity in different regions, age, and sex groups. (A) The comparison of the  
466 weighted prevalence of IC decline among the six regions of China (Chi-square test,  $p < 0.01$ ). (B)  
467 The comparison of the weighted prevalence of IC decline between North China and South China  
468 (Chi-square test,  $p < 0.01$ ). (C) The comparison of the intrinsic capacity score among different age  
469 groups (One-way ANOVA,  $p < 0.01$ ). (D) The comparison of the intrinsic capacity score between  
470 males and females (t-test,  $p < 0.01$ ). Abbreviations: ANOVA, analysis of variance; IC, intrinsic  
471 capacity; IC decline, Intrinsic capacity decline.

472 Figure 2. The weighted prevalence of declines in intrinsic capacity in community-dwelling older  
473 adults living in the urban area (A1), rural area (A2), male (B1), female (B2),  $<75$  ys (C1) and  $\geq 75$   
474 ys (C2). All were analyzed using the Chi-square test,  $p < 0.01$ .

475 Table S1. Comparison of characteristics between included and excluded participants

476 Table S2. Prevalence of each intrinsic capacity domain declined by sex, area, and age

477 Table S3. The effect of social factors, lifestyle and chronic conditions on intrinsic capacity decline

478

**Table 1. Prevalence of intrinsic capacity decline in older adults by sex, area, and age**

|                  | Total<br>n | Intrinsic<br>capacity decline<br>n (%) | Weighted<br>(%) | Number of Declined Domains |            |           |          |         |         |
|------------------|------------|----------------------------------------|-----------------|----------------------------|------------|-----------|----------|---------|---------|
|                  |            |                                        |                 | 0                          | 1          | 2         | 3        | 4       | 5       |
| All sample       | 5823       | 2506(43.0)                             | 39.9            | 3317(57.0)                 | 1512(26.0) | 636(10.9) | 271(4.7) | 75(1.3) | 12(0.2) |
| <b>Sex*</b>      |            |                                        |                 |                            |            |           |          |         |         |
| Male             | 2518       | 1030(40.9)                             | 36.7            | 1488(59.1)                 | 652(25.9)  | 266(10.6) | 81(3.2)  | 27(1.1) | 4(0.2)  |
| Female           | 3305       | 1476(44.7)                             | 43.0            | 1829(55.3)                 | 860(26.0)  | 370(11.3) | 190(5.7) | 48(1.5) | 8(0.2)  |
| <b>Area*</b>     |            |                                        |                 |                            |            |           |          |         |         |
| Urban            | 3494       | 1243(35.6)                             | 32.7            | 2251(64.4)                 | 868(24.8)  | 275(7.9)  | 81(2.3)  | 18(0.5) | 1(0)    |
| Rural            | 2329       | 1263(54.2)                             | 50.1            | 1066(45.8)                 | 644(27.7)  | 361(15.5) | 190(8.2) | 57(2.4) | 11(0.5) |
| <b>Age (ys)*</b> |            |                                        |                 |                            |            |           |          |         |         |
| 60-64            | 1471       | 428(29.1)                              | 28.6            | 1043(70.9)                 | 309(21.0)  | 85(5.8)   | 30(2.0)  | 4(0.3)  | 0(0)    |
| 65-69            | 1179       | 414(35.1)                              | 34.9            | 765(64.9)                  | 271(23.0)  | 100(8.5)  | 34(2.9)  | 9(0.8)  | 0(0)    |
| 70-74            | 1165       | 515(44.2)                              | 43.6            | 650(55.8)                  | 337(28.9)  | 116(10.0) | 46(3.9)  | 16(1.4) | 0(0)    |
| 75-79            | 1119       | 562(50.2)                              | 50.3            | 557(49.8)                  | 325(29.0)  | 150(13.4) | 62(5.5)  | 20(1.8) | 5(0.4)  |
| ≥80              | 889        | 587(66.0)                              | 66.6            | 302(34.0)                  | 270(30.4)  | 185(20.8) | 99(11.1) | 26(2.9) | 7(0.8)  |

Note: \*P<0.05.

479  
480 **Table 2. Stepwise forward logistic regression for associated factors with intrinsic capacity**  
481 **decline**

| Factors              | B      | S.E.  | Wald    | df | Sig    | OR    | 95% CI      |
|----------------------|--------|-------|---------|----|--------|-------|-------------|
| Older age            | 0.647  | 0.093 | 48.426  | 1  | <0.001 | 1.910 | 1.592-2.291 |
| North region         | 0.466  | 0.090 | 26.993  | 1  | <0.001 | 1.594 | 1.337-1.901 |
| Low education        | 0.890  | 0.143 | 38.657  | 1  | <0.001 | 2.435 | 1.839-3.223 |
| Unmarried            | 0.395  | 0.105 | 14.157  | 1  | <0.001 | 1.485 | 1.209-1.825 |
| Low income           | 0.388  | 0.094 | 16.974  | 1  | <0.001 | 1.474 | 1.226-1.773 |
| Less exercise        | 0.293  | 0.099 | 8.690   | 1  | 0.003  | 1.340 | 1.103-1.628 |
| Less meat intake     | 0.260  | 0.089 | 8.532   | 1  | 0.003  | 1.296 | 1.089-1.543 |
| Insomnia             | 0.453  | 0.095 | 22.735  | 1  | <0.001 | 1.572 | 1.305-1.894 |
| Urinary incontinence | 0.680  | 0.209 | 10.605  | 1  | 0.001  | 1.974 | 1.311-2.973 |
| Constipation         | 0.408  | 0.126 | 10.605  | 1  | 0.001  | 1.504 | 1.175-1.924 |
| Memory decline       | 0.714  | 0.083 | 73.427  | 1  | <0.001 | 2.043 | 1.735-2.405 |
| Slowness             | 0.407  | 0.102 | 15.908  | 1  | <0.001 | 1.502 | 1.230-1.835 |
| COPD                 | 0.853  | 0.215 | 15.758  | 1  | <0.001 | 2.347 | 1.540-3.576 |
| Osteoarthritis       | 0.534  | 0.095 | 31.785  | 1  | <0.001 | 1.706 | 1.417-2.054 |
| Constant             | -2.028 | 0.104 | 379.542 | 1  | <0.001 | 0.132 |             |

482 Note: COPD, chronic obstructive pulmonary disease.

483 The variables not in the equation were sex, living areas, alcohol consumption, coronary heart  
484 disease, diabetes, stroke and kidney disease.

485

486

**Table 3. Multivariate logistic regression analysis (forward method) for intrinsic capacity decline associated with risk of adverse clinical outcomes**

488

|            | Model 1 |               |         | Model 2 |               |         |
|------------|---------|---------------|---------|---------|---------------|---------|
|            | OR      | 95% CI        | P value | OR      | 95% CI        | P value |
| Frailty    | 19.625  | 14.044-27.423 | <0.001  | 19.021  | 12.882-28.084 | <0.001  |
| Disability | 12.628  | 8.750-18.225  | <0.001  | 8.661   | 5.925-12.660  | <0.001  |
| Fall       | 3.671   | 2.699-4.993   | <0.001  | 3.053   | 2.232-4.177   | <0.001  |
| Fracture   | 1.965   | 1.448-2.666   | <0.001  | 1.656   | 1.195-2.295   | 0.003   |
| Immobility | 6.098   | 4.903-7.584   | <0.001  | 4.403   | 3.500-5.538   | <0.001  |

489 Reference: Non-intrinsic capacity decline.

490 Model 1: Adjusted by age, sex, area and district.

491 Model 2: Adjusted by age, sex, area, district, marriage, education, waist hip ratio, smoking,  
492 alcohol consuming, exercise, income, and chronic diseases.

493

1  
2  
3  
4  
5  
6  
7  
8  
9  
10  
11  
12  
13  
14  
15  
16  
17  
18  
19  
20  
21  
22  
23  
24  
25  
26  
27  
28  
29  
30  
31  
32  
33  
34  
35  
36  
37  
38  
39  
40  
41  
42  
43  
44  
45  
46  
47  
48  
49  
50  
51  
52  
53  
54  
55  
56  
57  
58  
59  
60

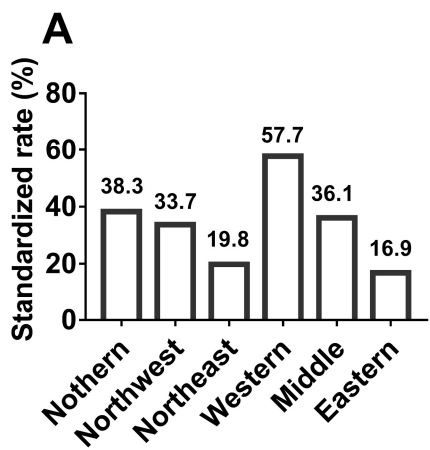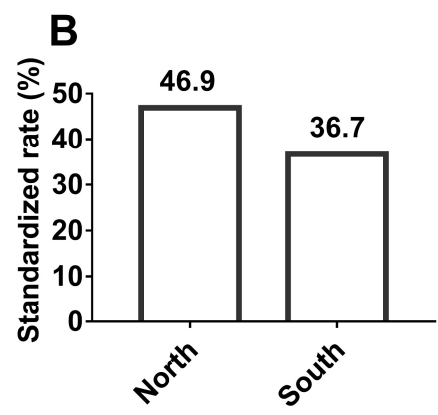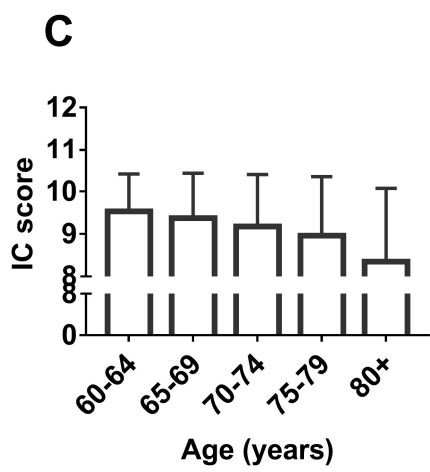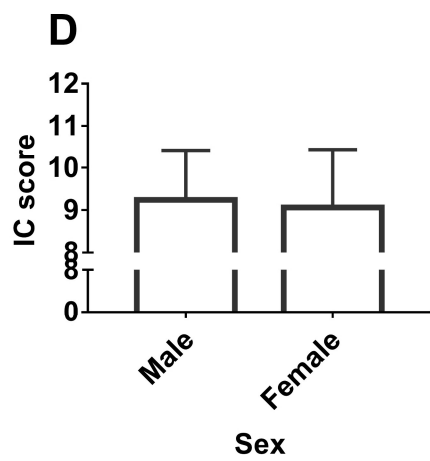

Review only

# A1

## Urban

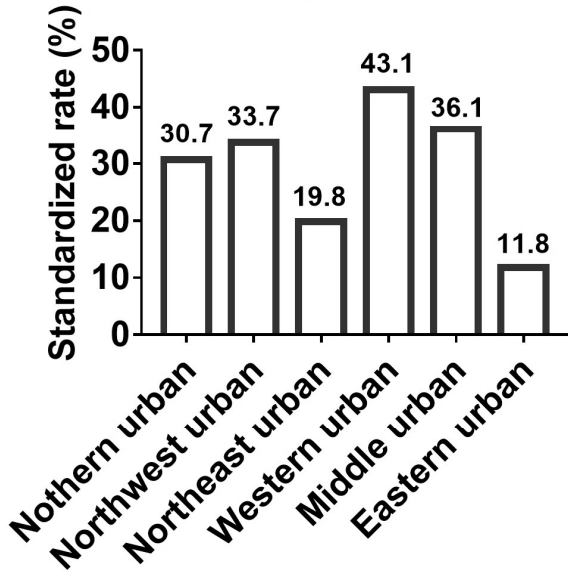

# A2

## Rural

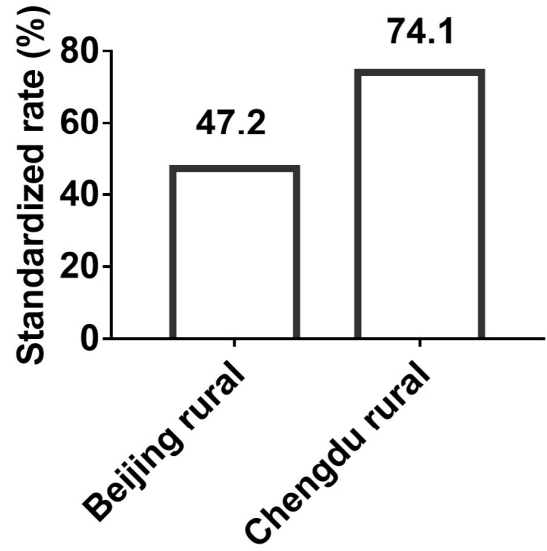

# B1

## Male

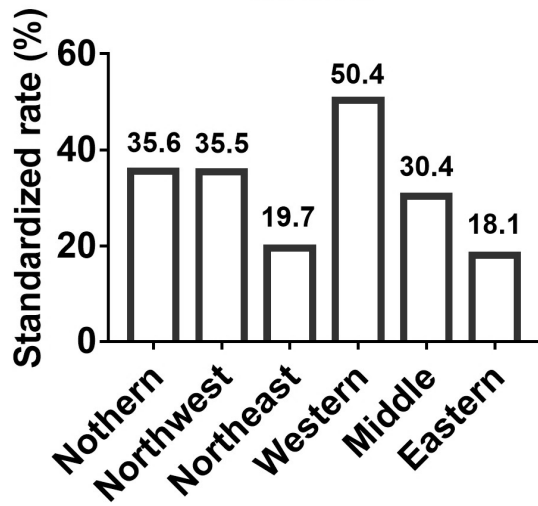

# B2

## Female

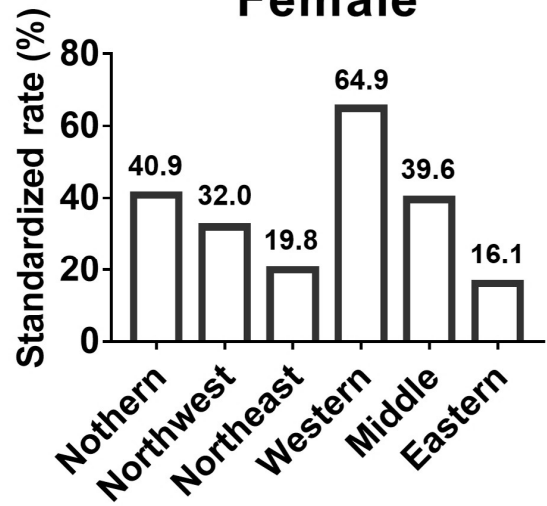

# C1

## <75 ys

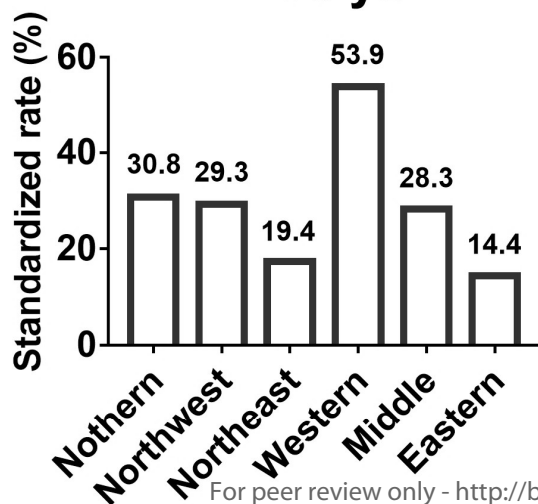

# C2

## >=75 ys

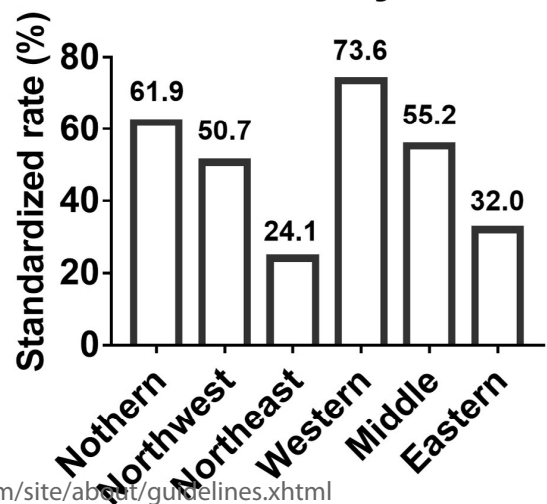

**Table S1. Comparison of characteristics between included and excluded participants**

|                               | Included participants | Excluded participants | <i>P</i> |
|-------------------------------|-----------------------|-----------------------|----------|
| Age (ys)                      | 70.86±7.68            | 72.43±7.37            | <0.001   |
| Sex (male) (n, %)             | 2518(43.2)            | 450(43.1)             | 0.934    |
| Education (Illiterate) (n, %) | 1047(18.0)            | 208(20.1)             | 0.102    |
| Hypertension (n, %)           | 3835(65.9)            | 744(71.3)             | 0.001    |
| CHD (n, %)                    | 1168(20.1)            | 291(28.0)             | <0.001   |
| Diabetes (n, %)               | 862(14.8)             | 186(17.9)             | 0.011    |
| Stroke (n, %)                 | 579(9.9)              | 139(13.4)             | 0.001    |
| Kidney disease                | 259(4.4)              | 50(4.8)               | 0.607    |
| COPD                          | 205(3.5)              | 49(4.7)               | 0.061    |
| Osteoporosis                  | 1597(27.4)            | 398(38.8)             | <0.001   |
| Immobility                    | 624(10.7)             | 189(18.2)             | <0.001   |
| Frailty index                 | 0.15±0.08             | 0.20±0.12             | <0.001   |
| Locomotion score              | 1.77±0.53             | 1.26±0.92             | <0.001   |
| Psychological score           | 1.86±0.38             | 1.88±0.36             | 0.122    |
| Cognition score               | 1.85±0.46             | 1.85±0.47             | 0.913    |
| Vitality score                | 1.82±0.51             | 1.88±0.42             | <0.001   |
| Sensory score                 | 1.84±0.42             | 1.76±0.47             | <0.001   |

Abbreviations: CHD, coronary heart disease; COPD, chronic obstructive pulmonary disease.



**Table S2. Prevalence of each intrinsic capacity domain declined by sex, area, and age**

|                 | Total | Locomotion | Cognition | Vitality  | Sensory    | Psychology |
|-----------------|-------|------------|-----------|-----------|------------|------------|
| All sample      | 5823  | 1039(17.8) | 646(11.1) | 735(12.6) | 824(14.2)  | 713(12.2)  |
| <b>Sex</b>      |       |            |           |           |            |            |
| Male            | 2518  | 372(14.8)* | 227(9.0)* | 338(13.4) | 371(14.7)  | 247(9.8)*  |
| Female          | 3305  | 667(20.2)  | 419(12.7) | 397(12.0) | 453(55.0)  | 466(14.1)  |
| <b>Area</b>     |       |            |           |           |            |            |
| Urban           | 3494  | 481(14.1)* | 168(4.8)* | 344(9.8)* | 417(11.9)* | 318(9.1)*  |
| Rural           | 2329  | 548(23.5)  | 478(20.5) | 391(16.8) | 407(17.5)  | 395(17.0)  |
| <b>Age (ys)</b> |       |            |           |           |            |            |
| 60-64           | 1471  | 106(7.2)*  | 72(4.9)*  | 116(7.9)* | 114(7.7)*  | 177(12.0)  |
| 65-69           | 1179  | 129(10.9)  | 90(7.6)   | 123(10.4) | 131(11.1)  | 136(11.5)  |
| 70-74           | 1165  | 197(16.9)  | 123(10.6) | 141(12.1) | 166(14.2)  | 144(12.4)  |
| 75-79           | 1119  | 256(22.9)  | 158(14.1) | 154(13.8) | 210(18.8)  | 138(12.3)  |
| ≥80             | 889   | 351(39.5)  | 203(22.8) | 201(22.6) | 203(22.8)  | 118(13.3)  |

Note: Data were expressed as n (%); \*P<0.05

**Table S3. The effect of social factors, lifestyle and chronic conditions on intrinsic capacity decline**

|                            | Total | IC decline, n (%) | Weighted (%) | $\chi^2$ | P      |
|----------------------------|-------|-------------------|--------------|----------|--------|
| <b>Social factors</b>      |       |                   |              |          |        |
| <b>Education</b>           | 5823  |                   |              |          |        |
| Illiterate                 | 1047  | 724(69.1)         | 67.7         | 355.086  | <0.001 |
| Not illiterate             | 4776  | 1782(37.3)        | 34.9         |          |        |
| <b>Monthly income</b>      | 5665  |                   |              |          |        |
| <2000 Yuan                 | 2658  | 1408(53.0)        | 49.6         | 227.561  | <0.001 |
| ≥2000 Yuan                 | 3007  | 996(33.1)         | 30.0         |          |        |
| <b>Marital status</b>      | 5818  |                   |              |          |        |
| Married                    | 4493  | 1738(38.7)        | 35.8         | 151.541  | <0.001 |
| Unmarried                  | 1325  | 765(57.7)         | 56.8         |          |        |
| <b>Lifestyle</b>           |       |                   |              |          |        |
| <b>Exercise</b>            | 5808  |                   |              |          |        |
| Yes                        | 4594  | 1779(38.7)        | 36.1         | 168.600  | <0.001 |
| No                         | 1214  | 722(59.5)         | 55.0         |          |        |
| <b>Meat intake</b>         | 5823  |                   |              |          |        |
| Usually                    | 3369  | 1322(39.2)        | 35.9         | 46.925   | <0.001 |
| Less                       | 2454  | 1184(48.2)        | 45.8         |          |        |
| <b>Alcohol consumption</b> | 5823  |                   |              |          |        |
| Yes                        | 4503  | 600(45.5)         | 40.7         | 4.081    | 0.043  |
| No                         | 5823  | 1906(42.3)        | 39.6         |          |        |
| <b>Smoking</b>             | 1320  |                   |              |          |        |
| Yes                        | 1658  | 722(43.5)         | 38.7         | 0.241    | 0.623  |
| No                         | 4165  | 1784(42.8)        | 40.5         |          |        |
| <b>Chronic disease</b>     |       |                   |              |          |        |
| <b>Hypertension</b>        | 5823  |                   |              |          |        |
| Yes                        | 2688  | 1127(41.9)        | 39.0         | 2.505    | 0.113  |
| No                         | 3135  | 1379(44.0)        | 40.7         |          |        |
| <b>CHD</b>                 | 5823  |                   |              |          |        |
| Yes                        | 1168  | 559(47.9)         | 46.0         | 13.823   | <0.001 |
| No                         | 4655  | 1947(41.8)        | 38.5         |          |        |
| <b>Diabetes</b>            | 5823  |                   |              |          |        |
| Yes                        | 862   | 344(39.9)         | 36.6         | 4.041    | 0.044  |
| No                         | 4961  | 2162(43.6)        | 40.5         |          |        |
| <b>Stroke</b>              | 5823  |                   |              |          |        |
| Yes                        | 579   | 327(56.5)         | 53.3         | 47.323   | <0.001 |
| No                         | 5244  | 2179(41.6)        | 38.5         |          |        |
| <b>Kidney disease</b>      | 5823  |                   |              |          |        |
| Yes                        | 259   | 136(52.5)         | 50.6         | 9.907    | 0.002  |
| No                         | 5564  | 2370(42.6)        | 39.4         |          |        |
| <b>COPD</b>                | 5823  |                   |              |          |        |
| Yes                        | 205   | 140(68.3)         | 66.7         | 55.288   | <0.001 |
| No                         | 5618  | 2366(42.1)        | 39.0         |          |        |

|    |                             |      |            |      |         |        |
|----|-----------------------------|------|------------|------|---------|--------|
| 1  |                             |      |            |      |         |        |
| 2  |                             |      |            |      |         |        |
| 3  | <b>Liver disease</b>        | 5823 |            |      |         |        |
| 4  | Yes                         | 253  | 107(42.3)  | 40.0 | 0.062   | 0.803  |
| 5  | No                          | 5570 | 2399(43.1) | 38.7 |         |        |
| 6  |                             |      |            |      |         |        |
| 7  | <b>Osteoarthritis</b>       | 5823 |            |      |         |        |
| 8  | Yes                         | 1597 | 855(53.5)  | 51.2 | 98.993  | <0.001 |
| 9  | No                          | 4226 | 1651(39.1) | 35.9 |         |        |
| 10 |                             |      |            |      |         |        |
| 11 | <b>Cancer</b>               | 5823 |            |      |         |        |
| 12 | Yes                         | 148  | 63(42.6)   | 39.7 | 0.013   | 0.909  |
| 13 | No                          | 5675 | 2443(43.0) | 39.9 |         |        |
| 14 | <b>Geriatric syndrome</b>   |      |            |      |         |        |
| 15 | <b>Insomnia</b>             | 5823 |            |      |         |        |
| 16 | Yes                         | 1427 | 830(58.2)  | 56.5 | 176.113 | <0.001 |
| 17 | No                          | 4396 | 1676(38.1) | 34.9 |         |        |
| 18 | <b>Memory decline</b>       | 5823 |            |      |         |        |
| 19 | Yes                         | 2629 | 1450(55.2) | 52.6 | 286.447 | <0.001 |
| 20 | No                          | 3194 | 1056(33.1) | 30.2 |         |        |
| 21 | <b>Urinary incontinence</b> | 5823 |            |      |         |        |
| 22 | Yes                         | 257  | 198(77.0)  | 76.3 | 126.654 | <0.001 |
| 23 | No                          | 5566 | 2308(41.5) | 38.5 |         |        |
| 24 | <b>Constipation</b>         | 5823 |            |      |         |        |
| 25 | Yes                         | 738  | 430(59.1)  | 56.6 | 87.043  | <0.001 |
| 26 | No                          | 5095 | 2076(40.8) | 37.8 |         |        |
| 27 | <b>Slowness</b>             | 3306 |            |      |         |        |
| 28 | Yes                         | 688  | 367(53.3)  | 50.2 | 54.008  | <0.001 |
| 29 | No                          | 2618 | 991(37.9)  | 35.1 |         |        |

Abbreviations: **IC**, **intrinsic capacity**; ADL, activities of daily living; IADL, instrumental activities of daily living; CHD, coronary heart disease; COPD, chronic obstructive pulmonary disease.

**STROBE 2007 (v4) Statement—Checklist of items that should be included in reports of *cross-sectional studies***

| Section/Topic                | Item # | Recommendation                                                                                                                                                                       | Reported on page # |
|------------------------------|--------|--------------------------------------------------------------------------------------------------------------------------------------------------------------------------------------|--------------------|
| <b>Title and abstract</b>    | 1      | (a) Indicate the study's design with a commonly used term in the title or the abstract                                                                                               | 1,2                |
|                              |        | (b) Provide in the abstract an informative and balanced summary of what was done and what was found                                                                                  | 3                  |
| <b>Introduction</b>          |        |                                                                                                                                                                                      |                    |
| Background/rationale         | 2      | Explain the scientific background and rationale for the investigation being reported                                                                                                 | 5                  |
| Objectives                   | 3      | State specific objectives, including any prespecified hypotheses                                                                                                                     | 5-6                |
| <b>Methods</b>               |        |                                                                                                                                                                                      |                    |
| Study design                 | 4      | Present key elements of study design early in the paper                                                                                                                              | 6                  |
| Setting                      | 5      | Describe the setting, locations, and relevant dates, including periods of recruitment, exposure, follow-up, and data collection                                                      | 6                  |
| Participants                 | 6      | (a) Give the eligibility criteria, and the sources and methods of selection of participants                                                                                          | 6                  |
| Variables                    | 7      | Clearly define all outcomes, exposures, predictors, potential confounders, and effect modifiers. Give diagnostic criteria, if applicable                                             | 6-8                |
| Data sources/<br>measurement | 8*     | For each variable of interest, give sources of data and details of methods of assessment (measurement). Describe comparability of assessment methods if there is more than one group | 6-8                |
| Bias                         | 9      | Describe any efforts to address potential sources of bias                                                                                                                            | 9                  |
| Study size                   | 10     | Explain how the study size was arrived at                                                                                                                                            | 9                  |
| Quantitative variables       | 11     | Explain how quantitative variables were handled in the analyses. If applicable, describe which groupings were chosen and why                                                         | 10                 |
| Statistical methods          | 12     | (a) Describe all statistical methods, including those used to control for confounding                                                                                                | 10                 |
|                              |        | (b) Describe any methods used to examine subgroups and interactions                                                                                                                  | 10                 |
|                              |        | (c) Explain how missing data were addressed                                                                                                                                          | N/A                |
|                              |        | (d) If applicable, describe analytical methods taking account of sampling strategy                                                                                                   | N/A                |
|                              |        | (e) Describe any sensitivity analyses                                                                                                                                                | N/A                |
| <b>Results</b>               |        |                                                                                                                                                                                      |                    |

|                          |     |                                                                                                                                                                                                              |       |
|--------------------------|-----|--------------------------------------------------------------------------------------------------------------------------------------------------------------------------------------------------------------|-------|
| Participants             | 13* | (a) Report numbers of individuals at each stage of study—eg numbers potentially eligible, examined for eligibility, confirmed eligible, included in the study, completing follow-up, and analysed            | 6     |
|                          |     | (b) Give reasons for non-participation at each stage                                                                                                                                                         | N/A   |
|                          |     | (c) Consider use of a flow diagram                                                                                                                                                                           | N/A   |
| Descriptive data         | 14* | (a) Give characteristics of study participants (eg demographic, clinical, social) and information on exposures and potential confounders                                                                     | 10    |
|                          |     | (b) Indicate number of participants with missing data for each variable of interest                                                                                                                          | N/A   |
| Outcome data             | 15* | Report numbers of outcome events or summary measures                                                                                                                                                         | 12    |
| Main results             | 16  | (a) Give unadjusted estimates and, if applicable, confounder-adjusted estimates and their precision (eg, 95% confidence interval). Make clear which confounders were adjusted for and why they were included | 11-12 |
|                          |     | (b) Report category boundaries when continuous variables were categorized                                                                                                                                    | N/A   |
|                          |     | (c) If relevant, consider translating estimates of relative risk into absolute risk for a meaningful time period                                                                                             | N/A   |
| Other analyses           | 17  | Report other analyses done—eg analyses of subgroups and interactions, and sensitivity analyses                                                                                                               | N/A   |
| <b>Discussion</b>        |     |                                                                                                                                                                                                              |       |
| Key results              | 18  | Summarise key results with reference to study objectives                                                                                                                                                     | 13    |
| Limitations              | 19  | Discuss limitations of the study, taking into account sources of potential bias or imprecision. Discuss both direction and magnitude of any potential bias                                                   | 15    |
| Interpretation           | 20  | Give a cautious overall interpretation of results considering objectives, limitations, multiplicity of analyses, results from similar studies, and other relevant evidence                                   | 15    |
| Generalisability         | 21  | Discuss the generalisability (external validity) of the study results                                                                                                                                        | 15    |
| <b>Other information</b> |     |                                                                                                                                                                                                              |       |
| Funding                  | 22  | Give the source of funding and the role of the funders for the present study and, if applicable, for the original study on which the present article is based                                                | 17    |

\*Give information separately for cases and controls in case-control studies and, if applicable, for exposed and unexposed groups in cohort and cross-sectional studies.

**Note:** An Explanation and Elaboration article discusses each checklist item and gives methodological background and published examples of transparent reporting. The STROBE checklist is best used in conjunction with this article (freely available on the Web sites of PLoS Medicine at <http://www.plosmedicine.org/>, Annals of Internal Medicine at <http://www.annals.org/>, and Epidemiology at <http://www.epidem.com/>). Information on the STROBE Initiative is available at [www.strobe-statement.org](http://www.strobe-statement.org).
