# Supplementary material for: Cross-sectional study examining the status of intrinsic capacity decline in community-dwelling older adults in China: prevalence, associated factors and implications for clinical care
Source: PubMed Central journal article supplement — BMJ Open. 2021 Jan 5;11(1):e043062. doi: 10.1136/bmjopen-2020-043062 (PMC7786809; doi:10.1136/bmjopen-2020-043062), 2021-01-05
Supplement: bmjopen-2020-043062supp001.pdf [file bmjopen-2020-043062supp001.pdf]

**Table S1. Comparison of characteristics between included and excluded participants**

|                               | Included participants | Excluded participants | <i>P</i> |
|-------------------------------|-----------------------|-----------------------|----------|
| Age (ys)                      | 70.86±7.68            | 72.43±7.37            | <0.001   |
| Sex (male) (n, %)             | 2518(43.2)            | 450(43.1)             | 0.934    |
| Education (Illiterate) (n, %) | 1047(18.0)            | 208(20.1)             | 0.102    |
| Hypertension (n, %)           | 3835(65.9)            | 744(71.3)             | 0.001    |
| CHD (n, %)                    | 1168(20.1)            | 291(28.0)             | <0.001   |
| Diabetes (n, %)               | 862(14.8)             | 186(17.9)             | 0.011    |
| Stroke (n, %)                 | 579(9.9)              | 139(13.4)             | 0.001    |
| Kidney disease                | 259(4.4)              | 50(4.8)               | 0.607    |
| COPD                          | 205(3.5)              | 49(4.7)               | 0.061    |
| Osteoporosis                  | 1597(27.4)            | 398(38.8)             | <0.001   |
| Immobility                    | 624(10.7)             | 189(18.2)             | <0.001   |
| Frailty index                 | 0.15±0.08             | 0.20±0.12             | <0.001   |
| Locomotion score              | 1.77±0.53             | 1.26±0.92             | <0.001   |
| Psychological score           | 1.86±0.38             | 1.88±0.36             | 0.122    |
| Cognition score               | 1.85±0.46             | 1.85±0.47             | 0.913    |
| Vitality score                | 1.82±0.51             | 1.88±0.42             | <0.001   |
| Sensory score                 | 1.84±0.42             | 1.76±0.47             | <0.001   |

Abbreviations: CHD, coronary heart disease; COPD, chronic obstructive pulmonary disease.

**Table S2. Prevalence of each intrinsic capacity domain declined by sex, area, and age**

|                 | Total | Locomotion | Cognition | Vitality  | Sensory    | Psychology |
|-----------------|-------|------------|-----------|-----------|------------|------------|
| All sample      | 5823  | 1039(17.8) | 646(11.1) | 735(12.6) | 824(14.2)  | 713(12.2)  |
| <b>Sex</b>      |       |            |           |           |            |            |
| Male            | 2518  | 372(14.8)* | 227(9.0)* | 338(13.4) | 371(14.7)  | 247(9.8)*  |
| Female          | 3305  | 667(20.2)  | 419(12.7) | 397(12.0) | 453(55.0)  | 466(14.1)  |
| <b>Area</b>     |       |            |           |           |            |            |
| Urban           | 3494  | 481(14.1)* | 168(4.8)* | 344(9.8)* | 417(11.9)* | 318(9.1)*  |
| Rural           | 2329  | 548(23.5)  | 478(20.5) | 391(16.8) | 407(17.5)  | 395(17.0)  |
| <b>Age (ys)</b> |       |            |           |           |            |            |
| 60-64           | 1471  | 106(7.2)*  | 72(4.9)*  | 116(7.9)* | 114(7.7)*  | 177(12.0)  |
| 65-69           | 1179  | 129(10.9)  | 90(7.6)   | 123(10.4) | 131(11.1)  | 136(11.5)  |
| 70-74           | 1165  | 197(16.9)  | 123(10.6) | 141(12.1) | 166(14.2)  | 144(12.4)  |
| 75-79           | 1119  | 256(22.9)  | 158(14.1) | 154(13.8) | 210(18.8)  | 138(12.3)  |
| ≥80             | 889   | 351(39.5)  | 203(22.8) | 201(22.6) | 203(22.8)  | 118(13.3)  |

Note: Data were expressed as n (%); \*P<0.05

**Table S3. The effect of social factors, lifestyle and chronic conditions on intrinsic capacity decline**

|                            | Total | IC decline, n (%) | Weighted (%) | $\chi^2$ | P      |
|----------------------------|-------|-------------------|--------------|----------|--------|
| <b>Social factors</b>      |       |                   |              |          |        |
| <b>Education</b>           | 5823  |                   |              |          |        |
| Illiterate                 | 1047  | 724(69.1)         | 67.7         | 355.086  | <0.001 |
| Not illiterate             | 4776  | 1782(37.3)        | 34.9         |          |        |
| <b>Monthly income</b>      | 5665  |                   |              |          |        |
| <2000 Yuan                 | 2658  | 1408(53.0)        | 49.6         | 227.561  | <0.001 |
| ≥2000 Yuan                 | 3007  | 996(33.1)         | 30.0         |          |        |
| <b>Marital status</b>      | 5818  |                   |              |          |        |
| Married                    | 4493  | 1738(38.7)        | 35.8         | 151.541  | <0.001 |
| Unmarried                  | 1325  | 765(57.7)         | 56.8         |          |        |
| <b>Lifestyle</b>           |       |                   |              |          |        |
| <b>Exercise</b>            | 5808  |                   |              |          |        |
| Yes                        | 4594  | 1779(38.7)        | 36.1         | 168.600  | <0.001 |
| No                         | 1214  | 722(59.5)         | 55.0         |          |        |
| <b>Meat intake</b>         | 5823  |                   |              |          |        |
| Usually                    | 3369  | 1322(39.2)        | 35.9         | 46.925   | <0.001 |
| Less                       | 2454  | 1184(48.2)        | 45.8         |          |        |
| <b>Alcohol consumption</b> | 5823  |                   |              |          |        |
| Yes                        | 4503  | 600(45.5)         | 40.7         | 4.081    | 0.043  |
| No                         | 5823  | 1906(42.3)        | 39.6         |          |        |
| <b>Smoking</b>             | 1320  |                   |              |          |        |
| Yes                        | 1658  | 722(43.5)         | 38.7         | 0.241    | 0.623  |
| No                         | 4165  | 1784(42.8)        | 40.5         |          |        |
| <b>Chronic disease</b>     |       |                   |              |          |        |
| <b>Hypertension</b>        | 5823  |                   |              |          |        |
| Yes                        | 2688  | 1127(41.9)        | 39.0         | 2.505    | 0.113  |
| No                         | 3135  | 1379(44.0)        | 40.7         |          |        |
| <b>CHD</b>                 | 5823  |                   |              |          |        |
| Yes                        | 1168  | 559(47.9)         | 46.0         | 13.823   | <0.001 |
| No                         | 4655  | 1947(41.8)        | 38.5         |          |        |
| <b>Diabetes</b>            | 5823  |                   |              |          |        |
| Yes                        | 862   | 344(39.9)         | 36.6         | 4.041    | 0.044  |
| No                         | 4961  | 2162(43.6)        | 40.5         |          |        |
| <b>Stroke</b>              | 5823  |                   |              |          |        |
| Yes                        | 579   | 327(56.5)         | 53.3         | 47.323   | <0.001 |
| No                         | 5244  | 2179(41.6)        | 38.5         |          |        |
| <b>Kidney disease</b>      | 5823  |                   |              |          |        |
| Yes                        | 259   | 136(52.5)         | 50.6         | 9.907    | 0.002  |
| No                         | 5564  | 2370(42.6)        | 39.4         |          |        |
| <b>COPD</b>                | 5823  |                   |              |          |        |
| Yes                        | 205   | 140(68.3)         | 66.7         | 55.288   | <0.001 |
| No                         | 5618  | 2366(42.1)        | 39.0         |          |        |

|                             |      |            |      |         |        |
|-----------------------------|------|------------|------|---------|--------|
| <b>Liver disease</b>        | 5823 |            |      |         |        |
| Yes                         | 253  | 107(42.3)  | 40.0 | 0.062   | 0.803  |
| No                          | 5570 | 2399(43.1) | 38.7 |         |        |
| <b>Osteoarthritis</b>       | 5823 |            |      |         |        |
| Yes                         | 1597 | 855(53.5)  | 51.2 | 98.993  | <0.001 |
| No                          | 4226 | 1651(39.1) | 35.9 |         |        |
| <b>Cancer</b>               | 5823 |            |      |         |        |
| Yes                         | 148  | 63(42.6)   | 39.7 | 0.013   | 0.909  |
| No                          | 5675 | 2443(43.0) | 39.9 |         |        |
| <b>Geriatric syndrome</b>   |      |            |      |         |        |
| <b>Insomnia</b>             | 5823 |            |      |         |        |
| Yes                         | 1427 | 830(58.2)  | 56.5 | 176.113 | <0.001 |
| No                          | 4396 | 1676(38.1) | 34.9 |         |        |
| <b>Memory decline</b>       | 5823 |            |      |         |        |
| Yes                         | 2629 | 1450(55.2) | 52.6 | 286.447 | <0.001 |
| No                          | 3194 | 1056(33.1) | 30.2 |         |        |
| <b>Urinary incontinence</b> | 5823 |            |      |         |        |
| Yes                         | 257  | 198(77.0)  | 76.3 | 126.654 | <0.001 |
| No                          | 5566 | 2308(41.5) | 38.5 |         |        |
| <b>Constipation</b>         | 5823 |            |      |         |        |
| Yes                         | 738  | 430(59.1)  | 56.6 | 87.043  | <0.001 |
| No                          | 5095 | 2076(40.8) | 37.8 |         |        |
| <b>Slowness</b>             | 3306 |            |      |         |        |
| Yes                         | 688  | 367(53.3)  | 50.2 | 54.008  | <0.001 |
| No                          | 2618 | 991(37.9)  | 35.1 |         |        |

Abbreviations: **IC**, **intrinsic capacity**; ADL, activities of daily living; IADL, instrumental activities of daily living; CHD, coronary heart disease; COPD, chronic obstructive pulmonary disease.
